1 **Comparative analysis of clonal evolution among patients with right-sided colon**  
2 **cancer, left-sided colon cancer and rectal cancer**

3

4 Santasree Banerjee<sup>1,2,3†</sup>, Xianxiang Zhang<sup>4†</sup>, Shan Kuang<sup>1,3†</sup>, Jigang Wang<sup>5†</sup>, Lei Li<sup>1,3,6†</sup>,  
5 Guangyi Fan<sup>1,2,3</sup>, Yonglun Luo<sup>1,2,3,7</sup>, Shuai Sun<sup>1,2,3</sup>, Peng Han<sup>1,3</sup>, Qingyao Wu<sup>4</sup>, Shujian Yang<sup>4</sup>,  
6 Xiaobin Ji<sup>5</sup>, Yong Li<sup>1,3</sup>, Li Deng<sup>1,3,8</sup>, Xiaofen Tian<sup>2,3,9</sup>, Zhiwei Wang<sup>1,2,3</sup>, Yue Zhang<sup>1,3</sup>, Kui  
7 Wu<sup>2,3</sup>, Shida Zhu<sup>2,3</sup>, Lars Bolund<sup>1,2,3,7,10</sup>, Huanming Yang<sup>2,11</sup>, Xun Xu<sup>1,2,3,12</sup>, Junnian Liu<sup>1,2,3\*</sup>,  
8 Yun Lu<sup>4,13\*</sup>, Xin Liu<sup>1,2,3\*</sup>

9

10 <sup>1</sup> BGI-Qingdao, BGI-Shenzhen, Qingdao, 266555, China.

11 <sup>2</sup> BGI-Shenzhen, Shenzhen, 518083, China.

12 <sup>3</sup> China National GeneBank, BGI-Shenzhen, Shenzhen, 518120, China.

13 <sup>4</sup> Department of Gastroenterology, General Surgery Center, The Affiliated Hospital of  
14 Qingdao University, Qingdao, 266555, China.

15 <sup>5</sup> Department of Pathology, The Affiliated Hospital of Qingdao University, Qingdao, 266555,  
16 China.

17 <sup>6</sup> School of Future Technology, University of Chinese Academy of Sciences, Beijing, 101408,  
18 China.

19 <sup>7</sup> Department of Biomedicine, Aarhus University, Aarhus 8000, Denmark.

20 <sup>8</sup> State Key Laboratory of Agricultural Genomics, BGI-Shenzhen, Shenzhen 518083, China.

21 <sup>9</sup> MGI, BGI-Shenzhen, Shenzhen 518083, China.

22 <sup>10</sup> Lars Bolund Institute of Regenerative Medicine, BGI-Qingdao, BGI-Shenzhen, Qingdao,  
23 China.

24 <sup>11</sup> James D. Watson Institute of Genome Sciences, Hangzhou 310058, Zhejiang, China

25 <sup>12</sup> Guangdong Provincial Key Laboratory of Genome Read and Write, BGI-Shenzhen,  
26 Guangdong, China.

27 <sup>13</sup> Shandong Key Laboratory of Digital Medicine and Computer Assisted Surgery, Qingdao  
28 University, Qingdao, China.

29

30 †These authors contributed equally to this study.

31 \*Correspondence

1 Xin Liu, BGI-Qingdao, BGI-Shenzhen, Qingdao, 266555, China. Tel: +86-18025460332;

2 Email: [liuxin@genomics.cn](mailto:liuxin@genomics.cn)

3 Yun Lu, Department of Gastroenterology, General Surgery Center, The Affiliated Hospital of

4 Qingdao University, Qingdao, 266555, China. Tel: +86-18661802231; Email:

5 [cloudylucn@126.com](mailto:cloudylucn@126.com)

6 Junnian Liu, BGI-Qingdao, BGI-Shenzhen, Qingdao, 266555, China. Tel: +86-18503088190;

7 Email: [chris.liu@genomics.cn](mailto:chris.liu@genomics.cn)

8

## 9 **Abstract**

10 **Background:** Tumor multi-region sequencing reveals intratumor heterogeneity (ITH) and  
11 clonal evolution which play a key role in progression and metastases of the tumor. However,  
12 large-scale high depths multiregional sequencing of colorectal cancer (CRC) has not been  
13 well studied. In addition, the comparative analysis among right-sided colon cancer (RCC),  
14 left-sided colon cancer (LCC) and rectal cancer (RC) patients as well as the study of lymph  
15 node metastasis (LN) with extranodal tumor deposits (ENTD) from evolutionary perspective  
16 remain unknown.

17 **Results:** In this prospective study, we recruited different stages of 68 CRC patients with RCC  
18 (18), LCC (20) and RC (30). We performed high-depth whole exome sequencing (WES) of  
19 206 tumor regions including 176 primary tumors, 19 LN and 11 ENTD samples. Our results  
20 showed ITH with a Darwinian pattern of evolution. We identified that the evolution pattern of  
21 LCC and RC was more complex and divergent than RCC, suggesting the evolutionary  
22 diversity in the initiation and progression of LCC and RC. Genetic and evolutionary  
23 evidences found that both LN and ENTD were of polyclonal in origin. Moreover, ENTD was  
24 a distinct entity from LN and evolved later.

25 **Conclusions:** In conclusion, our study showed the Darwinian pattern of evolution with  
26 differences in clonal evolution between RCC with LCC and RC.

27 **Keywords:** Colorectal cancer, intratumor heterogeneity, clonal evolution, right-sided colon  
28 cancer, left-sided colon cancer, rectal cancer, lymph node metastasis, extranodal tumor

1 deposits.

## 2 **Background**

3 CRC is the third most common malignancy and the second leading cause of cancer death  
4 worldwide [1]. According to the World Health Organization (WHO) GLOBOCAN database,  
5 there were 1,849,518 estimated new CRC cases and 880,792 CRC-related deaths in 2018 [2].  
6 In China, CRC is the second most common neoplasia, occupying the fifth position in  
7 mortality, accounting for an incidence of 521,490 new cases and 248,400 deaths in 2018 [2].

8 Tumor multi-region sequencing reveals ITH and clonal evolution which play a key role in  
9 progression and metastases of the tumor [3]. The development of effective target-based  
10 precision medicine and personalized cancer therapy is based on ITH and the pattern of clonal  
11 evolution in colorectal tumors [4]. Therefore, patients with CRC may respond variably to the  
12 same treatment, due to ITH and differences in clonal evolution, despite there being no  
13 significant differences identified in the tumor histopathology [5]. Hence, study of ITH and  
14 comparative analysis of clonal evolution is highly significant from both clinical and  
15 biological perspective, to understand the genomic changes driving the malignant process,  
16 which is fundamental to developing an effective personalized cancer therapy.

17 Recently, tumor multi-region sequencing studies of colorectal cancer have demonstrated  
18 ITH [6-13]. This multiregional sequencing approach, sequencing DNA samples from  
19 geographically separated regions of a single tumor, explores ITH and cancer evolution.  
20 Large-scale multiregional sequencing studies have systematically revealed ITH as well as  
21 cancer evolution in patients with non-small-cell lung cancer and renal cancer [14-16].  
22 However, large-scale multiregional sequencing studies of CRC have not been well reported.  
23 In addition, multiregional sequencing studies in CRC were performed at relatively shallow  
24 sequencing depths [6-10], making it difficult to assess ITH, due to inability to detect somatic  
25 mutations with low frequencies.

26 CRC is no longer regarded as a single disease with increasing knowledge of the molecular  
27 mechanisms of carcinogenesis. The location of the primary tumor, with respect to the right  
28 side or left side of the splenic flexure and rectum, is an important prognostic factor of CRC

1 [17, 18]. LCC and RC patients (originating from splenic flexure, descending colon, sigmoid  
2 colon and rectum) survive longer than RCC patients (originating from hepatic flexure,  
3 ascending colon and cecum). Clinical symptoms are also different between patients with RCC  
4 and LCC/RC [19, 20]. RCC patients tend to be older, female and have advanced stage of  
5 tumors with frequent metastasis to peritoneum compared to metastasis to lung and liver in  
6 LCC/RC patients. In addition, RCC and LCC/RC patients exhibits different treatment  
7 outcomes towards anti-epidermal growth factor receptor (EGFR) therapy [20]. Many studies  
8 have been done to explore the possible reasons for clinical heterogeneity between RCC and  
9 LCC/RC and found differences in their embryonic origin, blood supplies, genetic mutations,  
10 genomic expression profiles, immunological composition and bacterial population in tumor  
11 microenvironment [19-23]. However, the understanding of the ITH and clonal evolution that  
12 determine the pathogenesis of RCC and LCC/RC is still unclear.

13 Amongst CRC patients, the stage of the disease is one of the most important prognostic  
14 factors which is correlated with the disease survival rate [24]. Tumor Node Metastasis  
15 (TNM)/American Joint Committee on Cancer (AJCC) Cancer Staging system is the gold  
16 standard for determining the correct cancer stage, helping to make appropriate treatment plans.  
17 Among CRC patients, the presence of cancer cells in lymph nodes is defined as stage III  
18 disease [25]. In the 7th and 8th editions of TNM staging system, a separate entity, entitled  
19 extranodal tumour deposits (ENTD), was included as 'N1c' subcategory [26]. However,  
20 inclusion of ENTD within nodal staging has worldwide debates in CRC because lack of  
21 significant improvement of prognostic value [27-29]. Although, many ITH and evolution  
22 studies of CRC focus on spreading routes of lymphatic metastases by sampling paired  
23 primary tumors and LN, none of them included ENTD samples [10-13]. Therefore, the  
24 molecular signature and evolutionary relationship between LN and ENTD has not been clear  
25 till now. Hence, the characterization of the molecular signature and evolution of the primary  
26 tumor, LN and ENTD is very significant for TNM staging and therapeutic interventions for  
27 the patients with CRC.

28 In order to overcome the drawbacks of previous studies, we have comprehensively studied  
29 the ITH and clonal evolution of CRC, using high depth (median depth of 395×) WES of 206

1 multi-region tumor samples and 68 matched germline samples from 68 CRC tumors,  
2 determined the differences of ITH, and the clonal evolution of CRC in RCC, LCC and RC  
3 patients.

## 4 **Results**

5 Comprehensive clinical descriptions of these 68 CRC patients were provided in **Table S1**.  
6 Tumor multi-region high depth (median depth of 395×, range 179-596) WES was performed  
7 with 206 tumor regions (2-7 regions/tumor) including 176 primary tumor regions, 19 LN  
8 regions and 11 ENT regions, as well as 68 matched germline samples from 68 CRC patients.  
9 WES identified 6 hypermutated (mutation rates of each tumor region were >10 mutations/1  
10 Mb bases) CRC patients, of these four patients were identified with microsatellite instability  
11 (MSI). The remaining 62 CRC patients were microsatellite stable (MSS) and of these, 12 are  
12 RCC patients, 20 are LCC patients and 30 are RC patients. Hypermutated patients were  
13 analyzed separately.

### 14 **ITH in colorectal tumors**

15 WES of 62 tumors with 188 tumor regions identified 19454 somatic mutations including  
16 17560 SNVs (14361 non-silent SNVs) and 1894 INDELs (**Table S2**). The mutation rate  
17 identified by the multi-region WES was significantly higher than single sample sequencing  
18 due to detection of subclonal mutations (median number of mutations/1MB bases, 4.61 vs.  
19 3.23;  $P=8.9\times 10^{-9}$ ) (**Figure S3**). In our study, the mutation rate of single sample sequencing  
20 was significantly higher than single CRC sample sequencing data from The Cancer Genome  
21 Atlas [30] (TCGA), probably due to the higher sequencing depth in our study (median  
22 number of mutations/1 MB bases, 3.23 vs. 2.07;  $P=1.7\times 10^{-22}$ ) (**Figure S3**).

23 Then, identified somatic mutations were divided into clonal and subclonal mutations (**Fig.**  
24 **1A**). It is worth noting that 2 patients (CRC32 and CRC36) with LCC and 6 patients (CRC49,  
25 CRC42, CRC51, CRC48, CRC52 and CRC60) with RC had not identified with clonal  
26 mutations, suggesting that branched evolution was widespread in patients with LCC and RC.  
27 In addition, RCC Patients had significantly more clonal mutations than RC patients (median

1 number, 160 vs 119;  $P=0.035$ ) (**Figure S4**).

2 Somatic copy number alterations (SCNAs) were measured as length of segments affected  
3 by either gains or losses (detailed copy number data has been given in **Table S3**). We  
4 summarized the total length of the genome that subjected to SCNAs and calculated the  
5 percentage of clonal and subclonal SCNAs (**Fig. 1A**). Interestingly, in a RC patient (CRC43),  
6 all the identified SCNAs were subclonal. There were no significant differences in the length  
7 and percentage of SCNAs among the RCC, LCC and RC patients. (**Figure S5**).

8 In our study, we identified that the mutation frequency of 14 driver genes (*APC*, *TP53*,  
9 *KRAS*, *LZTR1*, *LRP1B*, *FBXW7*, *TCF7L2*, *FAT4*, *ARID1A*, *ATM*, *PIK3CA*, *AMER1*, *CSMD3*  
10 and *SMAD4*) were higher at patient-level than at sample-level, except *SMAD4* gene (**Fig. 1B**).  
11 In addition, we also found that the mutation frequency was higher at patient-level compared  
12 to the TCGA data [30] except *CSMD3* gene (**Fig. 1B**). Notably, the mutation frequency of the  
13 *LZTR1* gene was much higher than TCGA data [30] (**Fig. 1B**). Our study also identified  
14 higher frequency of SCNAs than TCGA [30] data, probably due to the identification of  
15 subclonal SCNAs (**Fig. 1C**).

## 16 **Clonal architecture in colorectal tumors**

17 All the mutations (SNVs and INDELs) were clustered according to their CCF values to  
18 understand the clonal architecture and evolutionary history of 62 colorectal tumors. Each  
19 colored circle in the phylogenetic tree represented one cluster of the tumor (**Fig. 2**).  
20 Phylogenetic trees for 62 tumors and 188 regions together with schematic diagram of 100  
21 tumor cells representing distribution of clusters in each tumor region were shown in **Figure**  
22 **S6**. Driver mutations, driver SCNAs and their clusters were annotated beside the phylogenetic  
23 trees (**Figure S6**). Detailed information of cluster numbers for each tumor was listed in **Table**  
24 **S4**, with a median of 6 clusters per tumor (range, 1 to 13). Our study showed that patients  
25 with LCC possessed significantly more cluster numbers than patients with both RCC (median  
26 number, 7.5 vs. 6;  $P=0.028$ ) and RC (median number, 7.5 vs. 5.5;  $P=0.025$ ) (**Figure S7**),  
27 which potentially reflected that LCC patients were structurally more complex than RCC  
28 patients in evolutionary perspective.

## 1 **Driver event alterations in CRC evolution**

2 Identifying cancer driver events and their clonality is highly significant to understand the  
3 driving force underlying the transformation of a benign tumor to a malignant one. Therefore,  
4 driver mutations, driver SCNAs, arm level SCNAs and their clonality were analyzed for  
5 colorectal tumors (**Fig. 3**).

6 We identified 1373 driver events (405 driver mutations, 707 driver SCNAs and 261 arm  
7 level SCNAs) among 62 colorectal tumors. Among these events, 44% of driver events (605  
8 out of 1373) were subclonal (41% of driver mutations, 40% of driver SCNAs and 60% of arm  
9 level SCNAs). Significantly lower percentage of clonal driver events were identified in RC  
10 patients than patients with both RCC (median percentage, 56% vs. 72%;  $P=0.031$ ) and LCC  
11 (median percentage, 56% vs. 74%;  $P=0.047$ ) (**Figures S8 and S9**). Hence, our study showed  
12 increased diversity in driver events existed in patients with RC.

13 In addition, no driver events were found consistently clonal among 62 patients (**Fig. 3**),  
14 suggesting high ITH status and evolutionary diversity existed among colorectal tumors, which  
15 might be the reason of low efficiency of target-based precision medicine in CRC treatment.  
16 All the driver SCNAs and most of the driver mutations were identified as “early events” while  
17 very few arm level SCNAs were identified as “early events”, suggesting that the genomic  
18 instability process occurred firstly at the driver SCNA level, then at the driver mutations level,  
19 and finally at the arm level SCNA level.

20 Driver mutations in *APC*, *TP53* and *KRAS* were mostly identified in all these 62 patients,  
21 which were predominantly clonal and identified as “early event”, suggesting their  
22 significance and key roles in tumor initiation. However, except for driver mutations in *APC*,  
23 *TP53* and *KRAS*, other identified driver mutations were completely different between patients  
24 with RCC and LCC (**Fig. 3**). The genes of driver SCNAs identified were the same in patients  
25 with LCC and RC while only 3 out of 24 genes of driver SCNAs (*CYSLTR2*, *FLT3* and  
26 *FOXO1*) were same in patients with RCC and LCC (**Fig. 3**). These huge differences in both  
27 driver mutations and driver SCNAs between the patients with RCC and LCC suggested that  
28 patients with LCC were evolutionary closer to the patients with RC than that of RCC.

## 1 **Conserved evolutionary features in CRC**

2 In order to understand the constraints and features of CRC evolution, we analyzed conserved  
3 patterns of driver events by REVOLVER [31] (**Fig. 4**). Evolutionary trajectories were  
4 clustered by the CCF and cluster information of all the driver events in 62 patients and four  
5 clusters (cluster red, blue, green and purple) were found (**Fig. 4**). In order to understand  
6 whether conserved patterns of CRC evolution correlated to distinct clinical phenotypes,  
7 clinical and genomic metrics were shown under 4 clusters (**Fig. 4**).

8 We found that the red and blue clusters had relatively fewer driver events than green and  
9 purple clusters. There were no specific genomic or clinical features for the tumors in red  
10 cluster. The blue, green and purple clusters had similar clinical features, which were enriched  
11 in LCC and RC patients, suggesting that LCC and RC patients were functionally more  
12 divergent than RCC patients in evolutionary perspective.

## 13 **Phylogenetic distance between LN and ENT D**

14 We analyzed 16 stage III patients to understand the phylogenetic distance and evolutionary  
15 relationship amongst primary tumor, LN and ENT D. CRC21, CRC28, CRC43 and CRC48  
16 were identified with both LN and ENT D samples which were sequenced (**Fig. 5**). In CRC21,  
17 we identified that the clonal evolution of LN and ENT D was similar, while ENT D appeared  
18 evolutionarily later than LN (**Figure S6**). In CRC28, two ENT D samples were clustered  
19 together while LN was far away from them, which indicated that the LN and ENT D were  
20 polyclonal in origin (**Fig. 5**). In CRC 43 and CRC48, we identified that the ENT D were not  
21 clustered together with LN and evolved separately (**Figures 5 and S6**). In tumors with more  
22 than one LN sequenced (CRC01, CRC11, CRC29 and CRC33), some LN were clustered  
23 together while some LN were not (**Fig. 5**). In tumors with two ENT D sequenced (CRC60),  
24 these two ENT D were far away from each other in the phylogenetic tree (**Fig. 5**). These  
25 findings suggested that both LN and ENT D were polyclonal in origin.

## 26 **Evolutionary process at mutational level**



1 Convergent features and parallel evolution in CRC

2 Evidence of convergent mutations in tumor driver genes may shed light on evolutionary  
3 selection, which may provide therapeutic targets for treatment. *APC*, *TP53* and *KRAS* were  
4 the most frequently mutated driver genes identified in our study, with mutation frequency of  
5 80.6 % (50/62), 80.6 % (50/62) and 51.6 % (32/62) respectively (**Figure S10**). Among these  
6 three genes, *APC* was the most frequent mutated gene in tumor samples. Among these 50  
7 patients with *APC* mutations, 19 (38%) had 2 mutations, consistent with the two-hit  
8 hypothesis of *APC* genes in CRC tumorigenesis [32] (**Figure S11**).

9 Evolutionary selection was also exemplified by parallel evolution of driver mutations, in  
10 which different driver mutations in same gene occurred among distinct regions of the same  
11 tumor. In CRC36 (LCC patient), two different nonsynonymous mutations in *TP53* were  
12 identified in tumor region 3 while another nonsynonymous mutation of *TP53* was detected in  
13 tumor region 1 and 4, indicating parallel evolution of *TP53*.

14 Mutation signature

15 We analyzed mutational processes based on previously published mutational signatures [33].  
16 We found that the age-related signature 1 was the predominant mutational process for all  
17 these 62 patients, with a median percentage of age-related mutations of 70% (**Figure S12**).

18 The median percentage of age-related signature 1 for clonal mutations was 73%, while it  
19 dropped to 53% for subclonal mutations (**Figure S12**). This finding suggested that except for  
20 age, other mutational processes played more important roles in subclonal than clonal  
21 mutations in tumors, which accounted for ITH of CRC. Except for age, other main mutational  
22 processes were defective DNA mismatch repair-related signature 6, 15 and defective DNA  
23 double-strand break-repair-related signature 3, suggesting that the main mutational process  
24 for ITH of CRC were age and defective of DNA repair system.

25 **Evolutionary process at copy number alteration level**

26 Chromosome instability

27 Previously, we analyzed the length and clonality of SCNAs (**Fig. 1A**), we then measured the

1 SCNAs frequency pattern in RCC, LCC and RC patients. The SCNA frequency pattern in  
2 patients with LCC and RC were similar with each other, while RCC patients were very  
3 different (**Figure S13**). As shown in **Figure S13**, RCC patients had more 9p gain, 3q gain,  
4 19p loss and less 20q gain, 18p loss, 8p loss than both LCC and RC patients. These results  
5 indicated that the SCNAs frequency pattern in CRC patients could be a potential biomarker to  
6 distinguish between RCC and LCC/RC patients.

#### 7 Mirrored subclonal allelic imbalance

8 Recent studies identified parallel evolution of SCNAs in NSCLC and renal cancer through  
9 mirrored subclonal allelic imbalance (MSAI) [14, 15]. We identified MSAI events in 23 of 62  
10 patients (37%, found in 5 RCC patients, 6 LCC patients and 12 RC patients) (**Figure S14**).  
11 MSAI parallel gain or loss events found in this study were summarized (**Fig. 6A**).  
12 Interestingly, RCC patients had 42% MSAI events, more than both LCC (30%) and RC (40%)  
13 patients. We also analyzed parallel evolution of driver SCNAs, 5 tumors (4 tumors with  
14 parallel amplification and 1 tumor with parallel deletion) were found to have driver SCNAs  
15 which overlapped with MSAI events (**Figs. 6B and C**). Interestingly, 2 of 5 patients (CRC12  
16 and CRC59) were identified with parallel amplification of *FLT3* gene in chromosome 13 (**Fig.**  
17 **6C**).

#### 18 **Evolution landscape of hypermutated CRC tumors**

19 All 6 (CRC04, CRC05, CRC09, CRC13, CRC15 and CRC17) hypermutated CRC patients  
20 were identified with RCC, of these two patients (CRC09 and CRC13) were with MSS and  
21 remaining four patients (CRC04, CRC05, CRC15, CRC17) were with MSI tumors (**Figure**  
22 **S15A**). All the 6 hypermutated patients had mutations in mismatch-repair genes, or in *POLE*  
23 or *POLD* gene family (**Figure S15A**). CRC09 had one missense mutation and one nonsense  
24 mutation of *POLE*. CRC13 had one missense mutation of *POLE* (**Figure S15A**). These  
25 findings were consistent with the predominant mutational process in these two patients with  
26 MSS tumors was *POLE*-related signature 10 (**Figure S15B**). Defective DNA mismatch  
27 repair-related signature 6, 15, or 26 contributed to the mutational process of 4 patients with

1 MSI tumors (**Figure S15B**). We also analyzed the evolution landscape of hypermutated  
2 tumors in SCNA level. The absolute SCNAs of hypermutated CRC patients occurred less  
3 (**Figure S15C**), which suggested that these hypermutated CRC patients were mainly having  
4 mutation driven tumors. Interestingly, CRC04 had MSAI events in X-chromosome (**Figure**  
5 **S16**).

## 6 **Discussion and conclusions**

7 In this present study, we performed high-depth WES and analyzed 206 multi-region tumor  
8 samples from 68 patients with CRC. Our result showed that the LCC patients were  
9 structurally and functionally more complex and divergent than RCC patients in terms of  
10 evolutionary perspective. Our result showed ENT D were later events in the evolution of the  
11 tumor than LN. In addition, all the CRC patients followed the Darwinian pattern of evolution.

### 12 **RCC, LCC and RC patients: In the light of clonal evolution**

13 Previous studies have shown remarkable differences among RCC, LCC and RC based on  
14 genetic mutations, genomic expression profiles, immunological composition and bacterial  
15 population in tumor microenvironment [20-24]. However, almost no research has been done  
16 till date for understanding the differences between different locations of CRC from  
17 evolutionary perspective, which is the key to explore the differences among RCC, LCC and  
18 RC in tumor initiation and progression. Our study demonstrated that ITH and evolution  
19 among LCC, RCC and RC patients were different in the following aspects: mutations, SCNAs,  
20 structure of polygenetic tree and driver events. Firstly, RC patients had shown fewer clonal  
21 mutations than RCC patients, indicating higher ITH in RC patients at mutational level.  
22 Secondly, the SCNAs frequency pattern in RCC patients were different from LCC and RC  
23 patients, which addressed the evolutionary difference between them at SCNAs level. Thirdly,  
24 the structure of phylogenetic trees in LCC and RC patients were more complicated and  
25 branched than that of the RCC patients. Specifically, LCC patients were identified with the  
26 most complicated structure of the phylogenetic tree, reflected by more cluster numbers. In  
27 addition, only LCC and RC patients were polyclonal in origin. Fourthly, LCC and RC patients  
28 were enriched in clusters (blue and purple clusters) which had more driver events, indicated

1 that LCC and RC patients showed more functional diversity in evolution. Moreover, RC  
2 patients were identified with less percentage of clonal driver events than both LCC and RCC  
3 patients, suggested that more functional diversity occurred in the process of evolution of RC  
4 patients. In conclusion, our data showed that LCC and RC patients were more divergent and  
5 complicated in terms of evolution than RCC patients, not only structurally but also  
6 functionally, which indicated that the evolutionary diversity might play an important role in  
7 the initiation and progression of CRC among LCC and RC patients. Furthermore, the SCNA  
8 frequency pattern could be a potential and significant biomarker to distinguish between RCC,  
9 LCC and RC patients.

#### 10 **Primary tumor, LN and ENT D: In evolutionary perspective**

11 To date, no systematic research studies have been done to understand the similarities and  
12 differences between ENT D and LN. In this study, we found that ENT D were later events in  
13 the evolution of the tumor than LN according to the clonal evolution history in CRC21. LN  
14 and ENT D could not be clustered together in the polygenetic tree according to the occurrence  
15 of mutations. Unlike in previous studies [10, 12], different LN or ENT D in the same tumor  
16 did not cluster together in all cases, indicating their polyclonal origin. In conclusion, ENT D  
17 was a distinct entity from LN and evolved later.

#### 18 **Evolution pattern: Darwinian pattern of evolution and neutral evolution**

19 In this present study, we found predominantly Darwinian pattern of evolution (59 out of 62  
20 patients) as well as linear evolution (3 out of 62 tumors). Previous studies proposed neutral  
21 evolution model for colorectal cancers [6, 34, 35], whilst our conclusion was different from  
22 them, based on three reasons. Firstly, clonal events of both mutations (SNVs and INDELS)  
23 and SCNAs were widespread, with a median percentage of 47% and 43% respectively.  
24 Secondly, 59% of driver mutations were clonal while only 41% of non-driver mutations were  
25 clonal, which indicated the enrichment of clonal driver mutations in course of evolution.  
26 Lastly, convergent and parallel events were present for driver genes in both mutational and  
27 SCNA level, especially for genes *APC*, *TP53* and *KRAS*. Previous studies also showed  
28 Darwinian pattern of evolution for the patients with colorectal cancer followed by neutral

1 evolution [8, 9]. In our study, we identified that 28% of subclonal mutations were shared by  
2 tumor regions (either branch or trunk mutations), which suggested the importance of branches  
3 in phylogenetic trees.

## 4 **Methods**

### 5 **Patient recruitment, sample collection and sample processing**

6 The study was approved by the Ethics committee of the Affiliated Hospital of Qingdao  
7 University. All the samples were collected after obtaining written informed consent from the  
8 patients.

9 Detailed process of sample collection and sample processing has been given in  
10 Supplemental methods. The filtering pipeline is schematically presented in the CONSORT  
11 diagram (CONSORT flowchart, **Figure S1**). The workflow summarizing experiments and  
12 data analysis in our study was shown in **Figure S2**.

### 13 **Pathology diagnoses and review**

14 Detailed process of pathological diagnoses and review has been given in Supplemental  
15 methods. Clinical details of 68 CRC patients were summarized in **Table S1**.

### 16 **WES and quality control**

17 WES was performed for tumor tissues and matched germline tissues. Detailed process of  
18 WES and quality control has been given in the Supplemental methods.

### 19 **Somatic mutation detection and filtering**

20 All mutations used in the analysis can be found in **Table S2**. Detailed process of somatic  
21 mutation detection and filtering has been given in the Supplemental methods.

### 22 **Driver mutation identification and copy number analysis**

23 Detailed process of identification of driver mutations and copy number analysis has been  
24 given in the Supplemental methods. Somatic copy number alterations (SCNAs) were  
25 identified and all segmented copy number data has been given in **Table S3**.

1     **Sub-clonal deconstruction and phylogenetic tree construction**

2     Sub-clonal deconstruction and phylogenetic trees were constructed. Clusters for phylogenetic  
3     tree construction were summarized in **Table S4**. Detailed process of sub-clonal deconstruction  
4     and phylogenetic tree construction has been given in the Supplemental methods.

5     **Analysis of evolution subtype and phylogenetic analysis**

6     Evolutionary subtypes were clustered and visualized. Phylogenetic distance between primary  
7     tumor, LN and ENT D were analyzed. Detailed process of evolution subtype and phylogenetic  
8     analysis has been given in the Supplemental methods.

9     **Mutation signature analysis**

10    Mutation signatures were estimated. Detailed process of mutation signature analysis has been  
11    given in the Supplemental methods.

12    **Mirrored sub-clonal allelic imbalance and statistical analysis**

13    Mirrored sub-clonal allelic imbalance and statistical analysis were performed. All statistical  
14    analyses were performed in R statistical environment version  $\geq 3.5.0$ . Detailed process of  
15    analysis of mirrored sub-clonal allelic imbalance and statistical analysis has been given in the  
16    Supplemental methods.

17    **Acknowledgements**

18    We are thankful to the proband and all the family members for participating in our study and  
19    we are thankful to the China National GeneBank.

20    **Authors' contributions**

21    Conception and design: Santasree Banerjee, Shan Kuang, Junnian Liu, Yun Lu, Xin Liu;  
22    Acquisition of data (provided animals, acquired and managed patients, provided facilities,  
23    etc.): Xianxiang Zhang, Qingyao Wu, Shujian Yang, Jigang Wang, Xiaobin Ji, Peng Han,  
24    Yong Li, Xiaofen Tian, Zhiwei Wang; Analysis and interpretation of data (e.g., statistical  
25    analysis, biostatistics, computational analysis): Santasree Banerjee, Shan Kuang, Lei Li, Shui

1 Shun, Li Deng, Yue Zhang; Writing, review, and/or revision of the manuscript: Santasree  
2 Banerjee, Shan Kuang, Lei Li, Xianxiang Zhang, Jigang Wang; Administrative, technical, or  
3 material support (i.e., reporting or organizing data, constructing databases): Huanming Yang,  
4 Lars Bolund, Yonglun Luo, Kui Wu, Shida Zhu, Guangyi Fan, Xun Xu; Study supervision:  
5 Santasree Banerjee, Shan Kuang, Junnian Liu, Yun Lu, Xin Liu.

## 6 **Funding**

7 The study was supported by the grants from Guangdong Provincial Key Laboratory of  
8 Genome Read and Write (No. 2017B030301011), National Natural Science Foundation of  
9 China (No. 81802473), key research and development plan of Shandong province (No.  
10 2018GSF118206) and "Clinical medicine + X" project from Medical College of Qingdao  
11 University.

## 12 **Availability of data and materials**

13 The sequencing data has been deposited at the CNGB Nucleotide Sequence Archive (CNSA:  
14 <https://db.cngb.org/cnsa>), under accession number CNP0000594.

## 15 **Ethics approval and consent to participate**

16 The study was approved by the Ethics committee of the Affiliated Hospital of Qingdao  
17 University. All the samples were collected after obtaining written informed consent from the  
18 patients.

## 19 **Competing interests**

20 No potential conflicts of interest were disclosed.

## 21 **References**

- 22 1. World Health Organization. Cancer. <https://www.who.int/news-room/fact-sheets/detail/cancer>.  
23 Accessed January 21, 2019.
- 24 2. International Agency for Research on Cancer. Cancer Today. <https://gco.iarc.fr/today/>.  
25 Accessed January 21, 2019.
- 26 3. Alizadeh AA, Aranda V, Bardelli A, Blanpain C, Bock C, Borowski C, Caldas C, Califano A,  
27 Doherty M, Elsner M: Toward understanding and exploiting tumor heterogeneity. Nature

- 1 medicine 2015, 21:846.
- 2 4. Turner NC, Reis-Filho JS: Genetic heterogeneity and cancer drug resistance. *The lancet*
- 3 *oncology* 2012, 13:e178-e185.
- 4 5. Waddell N, Pajic M, Patch A-M, Chang DK, Kassahn KS, Bailey P, Johns AL, Miller D,
- 5 Nones K, Quek K: Whole genomes redefine the mutational landscape of pancreatic cancer.
- 6 *Nature* 2015, 518:495-501.
- 7 6. Sottoriva A, Kang H, Ma Z, Graham TA, Salomon MP, Zhao J, Marjoram P, Siegmund K,
- 8 Press MF, Shibata D: A Big Bang model of human colorectal tumor growth. *Nature genetics*
- 9 2015, 47:209.
- 10 7. Roerink SF, Sasaki N, Lee-Six H, Young MD, Alexandrov LB, Behjati S, Mitchell TJ,
- 11 Grossmann S, Lightfoot H, Egan DA: Intra-tumour diversification in colorectal cancer at the
- 12 single-cell level. *Nature* 2018, 556:457.
- 13 8. Uchi R, Takahashi Y, Niida A, Shimamura T, Hirata H, Sugimachi K, Sawada G, Iwaya T,
- 14 Kurashige J, Shinden Y: Integrated multiregional analysis proposing a new model of
- 15 colorectal cancer evolution. *PLoS genetics* 2016, 12:e1005778.
- 16 9. Saito T, Niida A, Uchi R, Hirata H, Komatsu H, Sakimura S, Hayashi S, Nambara S, Kuroda Y,
- 17 Ito S: A temporal shift of the evolutionary principle shaping intratumor heterogeneity in
- 18 colorectal cancer. *Nature communications* 2018, 9:2884.
- 19 10. Wei Q, Ye Z, Zhong X, Li L, Wang C, Myers R, Palazzo J, Fortuna D, Yan A, Waldman S:
- 20 Multiregion whole-exome sequencing of matched primary and metastatic tumors revealed
- 21 genomic heterogeneity and suggested polyclonal seeding in colorectal cancer metastasis.
- 22 *Annals of Oncology* 2017, 28:2135-2141.
- 23 11. Alves JM, Prado-López S, Cameselle-Teijeiro JM, Posada D: Rapid evolution and
- 24 biogeographic spread in a colorectal cancer. *Nature communications* 2019, 10:5139.
- 25 12. Hu Z, Ding J, Ma Z, Sun R, Seoane JA, Shaffer JS, Suarez CJ, Berghoff AS, Cremolini C,
- 26 Falcone A: Quantitative evidence for early metastatic seeding in colorectal cancer. *Nature*
- 27 *genetics* 2019:1.
- 28 13. Zhang C, Zhang L, Xu T, Xue R, Yu L, Zhu Y, Wu Y, Zhang Q, Li D, Shen S: Mapping the
- 29 spreading routes of lymphatic metastases in human colorectal cancer. *Nature Communications*
- 30 2020, 11:1-11.
- 31 14. Jamal-Hanjani M, Wilson GA, McGranahan N, Birkbak NJ, Watkins TB, Veeriah S, Shafi S,
- 32 Johnson DH, Mitter R, Rosenthal R: Tracking the evolution of non-small-cell lung cancer.
- 33 *New England Journal of Medicine* 2017, 376:2109-2121.
- 34 15. Turajlic S, Xu H, Litchfield K, Rowan A, Horswell S, Chambers T, O'Brien T, Lopez JI,
- 35 Watkins TB, Nicol D: Deterministic evolutionary trajectories influence primary tumor growth:
- 36 TRACERx renal. *Cell* 2018, 173:595-610. e511.
- 37 16. Turajlic S, Xu H, Litchfield K, Rowan A, Chambers T, Lopez JI, Nicol D, O'Brien T, Larkin J,
- 38 Horswell S: Tracking cancer evolution reveals constrained routes to metastases: TRACERx
- 39 Renal. *Cell* 2018, 173:581-594. e512.
- 40 17. Loupakis F, Yang D, Yau L, Feng S, Cremolini C, Zhang W, Maus MK, Antoniotti C, Langer
- 41 C, Scherer SJ: Primary tumor location as a prognostic factor in metastatic colorectal cancer.
- 42 *JNCI: Journal of the National Cancer Institute* 2015, 107.
- 43 18. Petrelli F, Tomasello G, Borgonovo K, Ghidini M, Turati L, Dallera P, Passalacqua R, Sgroi G,
- 44 Barni S: Prognostic survival associated with left-sided vs right-sided colon cancer: a



- 1 systematic review and meta-analysis. *JAMA oncology* 2017, 3:211-219.
- 2 19. Missiaglia E, Jacobs B, D'ario G, Di Narzo A, Sonesson C, Budinska E, Popovici V, Vecchione  
3 L, Gerster S, Yan P: Distal and proximal colon cancers differ in terms of molecular,  
4 pathological, and clinical features. *Annals of oncology* 2014, 25:1995-2001.
- 5 20. Lee MS, Menter DG, Kopetz S: Right versus left colon cancer biology: integrating the  
6 consensus molecular subtypes. *Journal of the National Comprehensive Cancer Network* 2017,  
7 15:411-419.
- 8 21. Hu W, Yang Y, Li X, Huang M, Xu F, Ge W, Zhang S, Zheng S: Multi-omics approach reveals  
9 distinct differences in left-and right-sided Colon Cancer. *Molecular Cancer Research* 2018,  
10 16:476-485.
- 11 22. Imperial R, Ahmed Z, Toor OM, Erdoğan C, Khaliq A, Case P, Case J, Kennedy K, Cummings  
12 LS, Melton N: Comparative proteogenomic analysis of right-sided colon cancer, left-sided  
13 colon cancer and rectal cancer reveals distinct mutational profiles. *Molecular cancer* 2018,  
14 17:177.
- 15 23. Baek SK: Laterality: Immunological Differences Between Right-Sided and Left-Sided Colon  
16 Cancer. *Annals of Coloproctology* 2019, 35:291-293.
- 17 24. O'Connell JB, Maggard MA, Ko CY: Colon cancer survival rates with the new American  
18 Joint Committee on Cancer sixth edition staging. *Journal of the National Cancer Institute* 2004,  
19 96:1420-1425.
- 20 25. Adjuvant therapy for patients with colon and rectal cancer. *JAMA* 1990, 264:1444-1450.
- 21 26. Weiser MR: *AJCC 8th edition: colorectal cancer*. *Annals of surgical oncology* 2018,  
22 25:1454-1455.
- 23 27. Ueno H, Mochizuki H, Akagi Y, Kusumi T, Yamada K, Ikegami M, Kawachi H, Kameoka S,  
24 Ohkura Y, Masaki T: Optimal colorectal cancer staging criteria in TNM classification. *Journal*  
25 *of Clinical Oncology* 2012, 30:1519-1526.
- 26 28. Lord AC, D'Souza N, Pucher PH, Moran BJ, Abulafi AM, Wotherspoon A, Rasheed S, Brown  
27 G: Significance of extranodal tumour deposits in colorectal cancer: A systematic review and  
28 meta-analysis. *European Journal of Cancer* 2017, 82:92-102.
- 29 29. Nagtegaal ID, Kniijn N, Hugen N, Marshall HC, Sugihara K, Tot T, Ueno H, Quirke P: Tumor  
30 deposits in colorectal cancer: improving the value of modern staging-a systematic review and  
31 meta-analysis. *Journal of Clinical Oncology* 2017, 35:1119-1127.
- 32 30. Network CGA: Comprehensive molecular characterization of human colon and rectal cancer.  
33 *Nature* 2012, 487:330.
- 34 31. Caravagna G, Giarratano Y, Ramazzotti D, Tomlinson I, Graham TA, Sanguinetti G, Sottoriva  
35 A: Detecting repeated cancer evolution from multi-region tumor sequencing data. *Nature*  
36 *methods* 2018, 15:707.
- 37 32. Rowan A, Lamlum H, Ilyas M, Wheeler J, Straub J, Papadopoulou A, Bicknell D, Bodmer W,  
38 Tomlinson I: APC mutations in sporadic colorectal tumors: a mutational "hotspot" and  
39 interdependence of the "two hits". *Proceedings of the National Academy of Sciences* 2000,  
40 97:3352-3357.
- 41 33. Alexandrov LB, Nik-Zainal S, Wedge DC, Aparicio SA, Behjati S, Biankin AV, Bignell GR,  
42 Bolli N, Borg A, Børresen-Dale AL, et al: Signatures of mutational processes in human cancer.  
43 *Nature* 2013, 500:415-421.
- 44 34. Williams MJ, Werner B, Barnes CP, Graham TA, Sottoriva A: Identification of neutral tumor

- 1 evolution across cancer types. Nature genetics 2016, 48:238.  
2 35. Loeb LA, Kohrn BF, Loubet-Seneor KJ, Dunn YJ, Ahn EH, O’Sullivan JN, Salk JJ, Bronner  
3 MP, Beckman RA: Extensive subclonal mutational diversity in human colorectal cancer and  
4 its significance. Proceedings of the National Academy of Sciences 2019, 116:26863-26872.

## 5 **Figure legends**

6 **Fig. 1** Overview of genomic heterogeneity in CRC tumors. **a** Heterogeneity of mutations and  
7 somatic copy-number alterations (SCNAs). Tumors were sorted by location and stage. (1)  
8 Number of all SNV and INDEL mutations (including coding and noncoding mutations) in  
9 CRC tumors. (2) The percentages of clonal mutations in CRC tumors. (3) Quantification of  
10 SCNAs in CRC tumors. (4) The percentages of clonal SCNAs in CRC tumors. (5)  
11 Demographic and clinical characteristics of the 62 CRC patients in this study (divided by  
12 histology; stage; number of regions; tumor size; age and tumor location). **b** Mutation  
13 frequency of driver genes (driver mutations occurred in not less than 10 patients) and  
14 comparison with TCGA data. **c** Frequency of SCNAs in CRC tumors. The dotted lines were  
15 frequency of SCNAs in TCGA CRC samples.

16 **Fig. 2** Phylogenetic trees. Phylogenetic trees for each CRC tumor were shown. The trees  
17 were ordered by overall stage (I, □, □, IV) and position (right-sided colon, left-sided colon  
18 and rectum). The cluster number corresponding to the color was displayed in the upper right  
19 corner with largest cluster labeled “1”. The lines connecting clusters does not contain any  
20 information.

21 **Fig. 3** Summary of driver events in CRC evolution. Mutations and SCNAs were shown as  
22 occurrence in patients indicating whether the events are clonal (blue) or subclonal (red). Only  
23 genes that were mutated in at least five patients in total or two patients in right-sided  
24 colon/left-sided colon/rectum were shown. For SCNAs, driver SCNAs in at least 20% of the  
25 patients were shown while all the arm level SCNAs were shown. Driver events with more  
26 subclonal occurrence than clonal occurrence in tumors were late events, otherwise they were  
27 early events. In the arm level SCNAs part, “G” represented gain, “L” represented loss, and the  
28 numbers in parentheses represented the time of occurrence in tumors.

1       **Fig. 4** Evolutionary subtypes. Evolutionary trajectories were clustered based on CCF  
2 value and cluster information of driver mutations, driver SCNAs and arm-level SCNAs. Heat  
3 maps showed the most recurrent evolution for the most recurrent driver mutations, driver  
4 SCNAs and arm-level SCNAs. Alterations were ordered by their frequencies in CRC tumors.  
5 CRC tumors are annotated by the following parameters: ITH index (high: half of the largest  
6 ITH index value; low: the other half), TMB (high > median, low ≤ median), SCNA index (high >  
7 median, low ≤ median), tumor location, histology, stage, number of regions, tumor size and  
8 age.

9       **Fig. 5** Phylogenetic distance between primary tumor, LN and ENTD. Heatmap showed the  
10 presence (blue) and absence (white) of all the mutations (SNVs and INDELS) among different  
11 tumor regions of the patients with lymph node metastasis or ENTD. Phylogeny reconstruction  
12 using maximum parsimony based on mutational presence or absence of all the mutations were  
13 shown beside heatmap. Driver genes were labeled in the phylogenetic trees.

14       **Fig. 6** Parallel evolution. **a** Genomic position and size of all mirrored subclonal allelic  
15 imbalance (MSAI) parallel gain or loss events found in this study. This included  
16 genome-wide copy number gains and losses which was subjected to MSAI events and their  
17 occurrence in CRC tumors. **b** Parallel evolution of driver SCNAs observed in 5 CRC tumors,  
18 indicted by the depth ratio and B-allele frequency values of the same chromosome on which  
19 the driver SCNAs were located. **c** Phylogenetic trees that indicated parallel evolution of driver  
20 amplifications (Amp) or deletions (Del) (Driver SCNAs) detected through the observation of  
21 MSAI (arrows).

# Figure 1

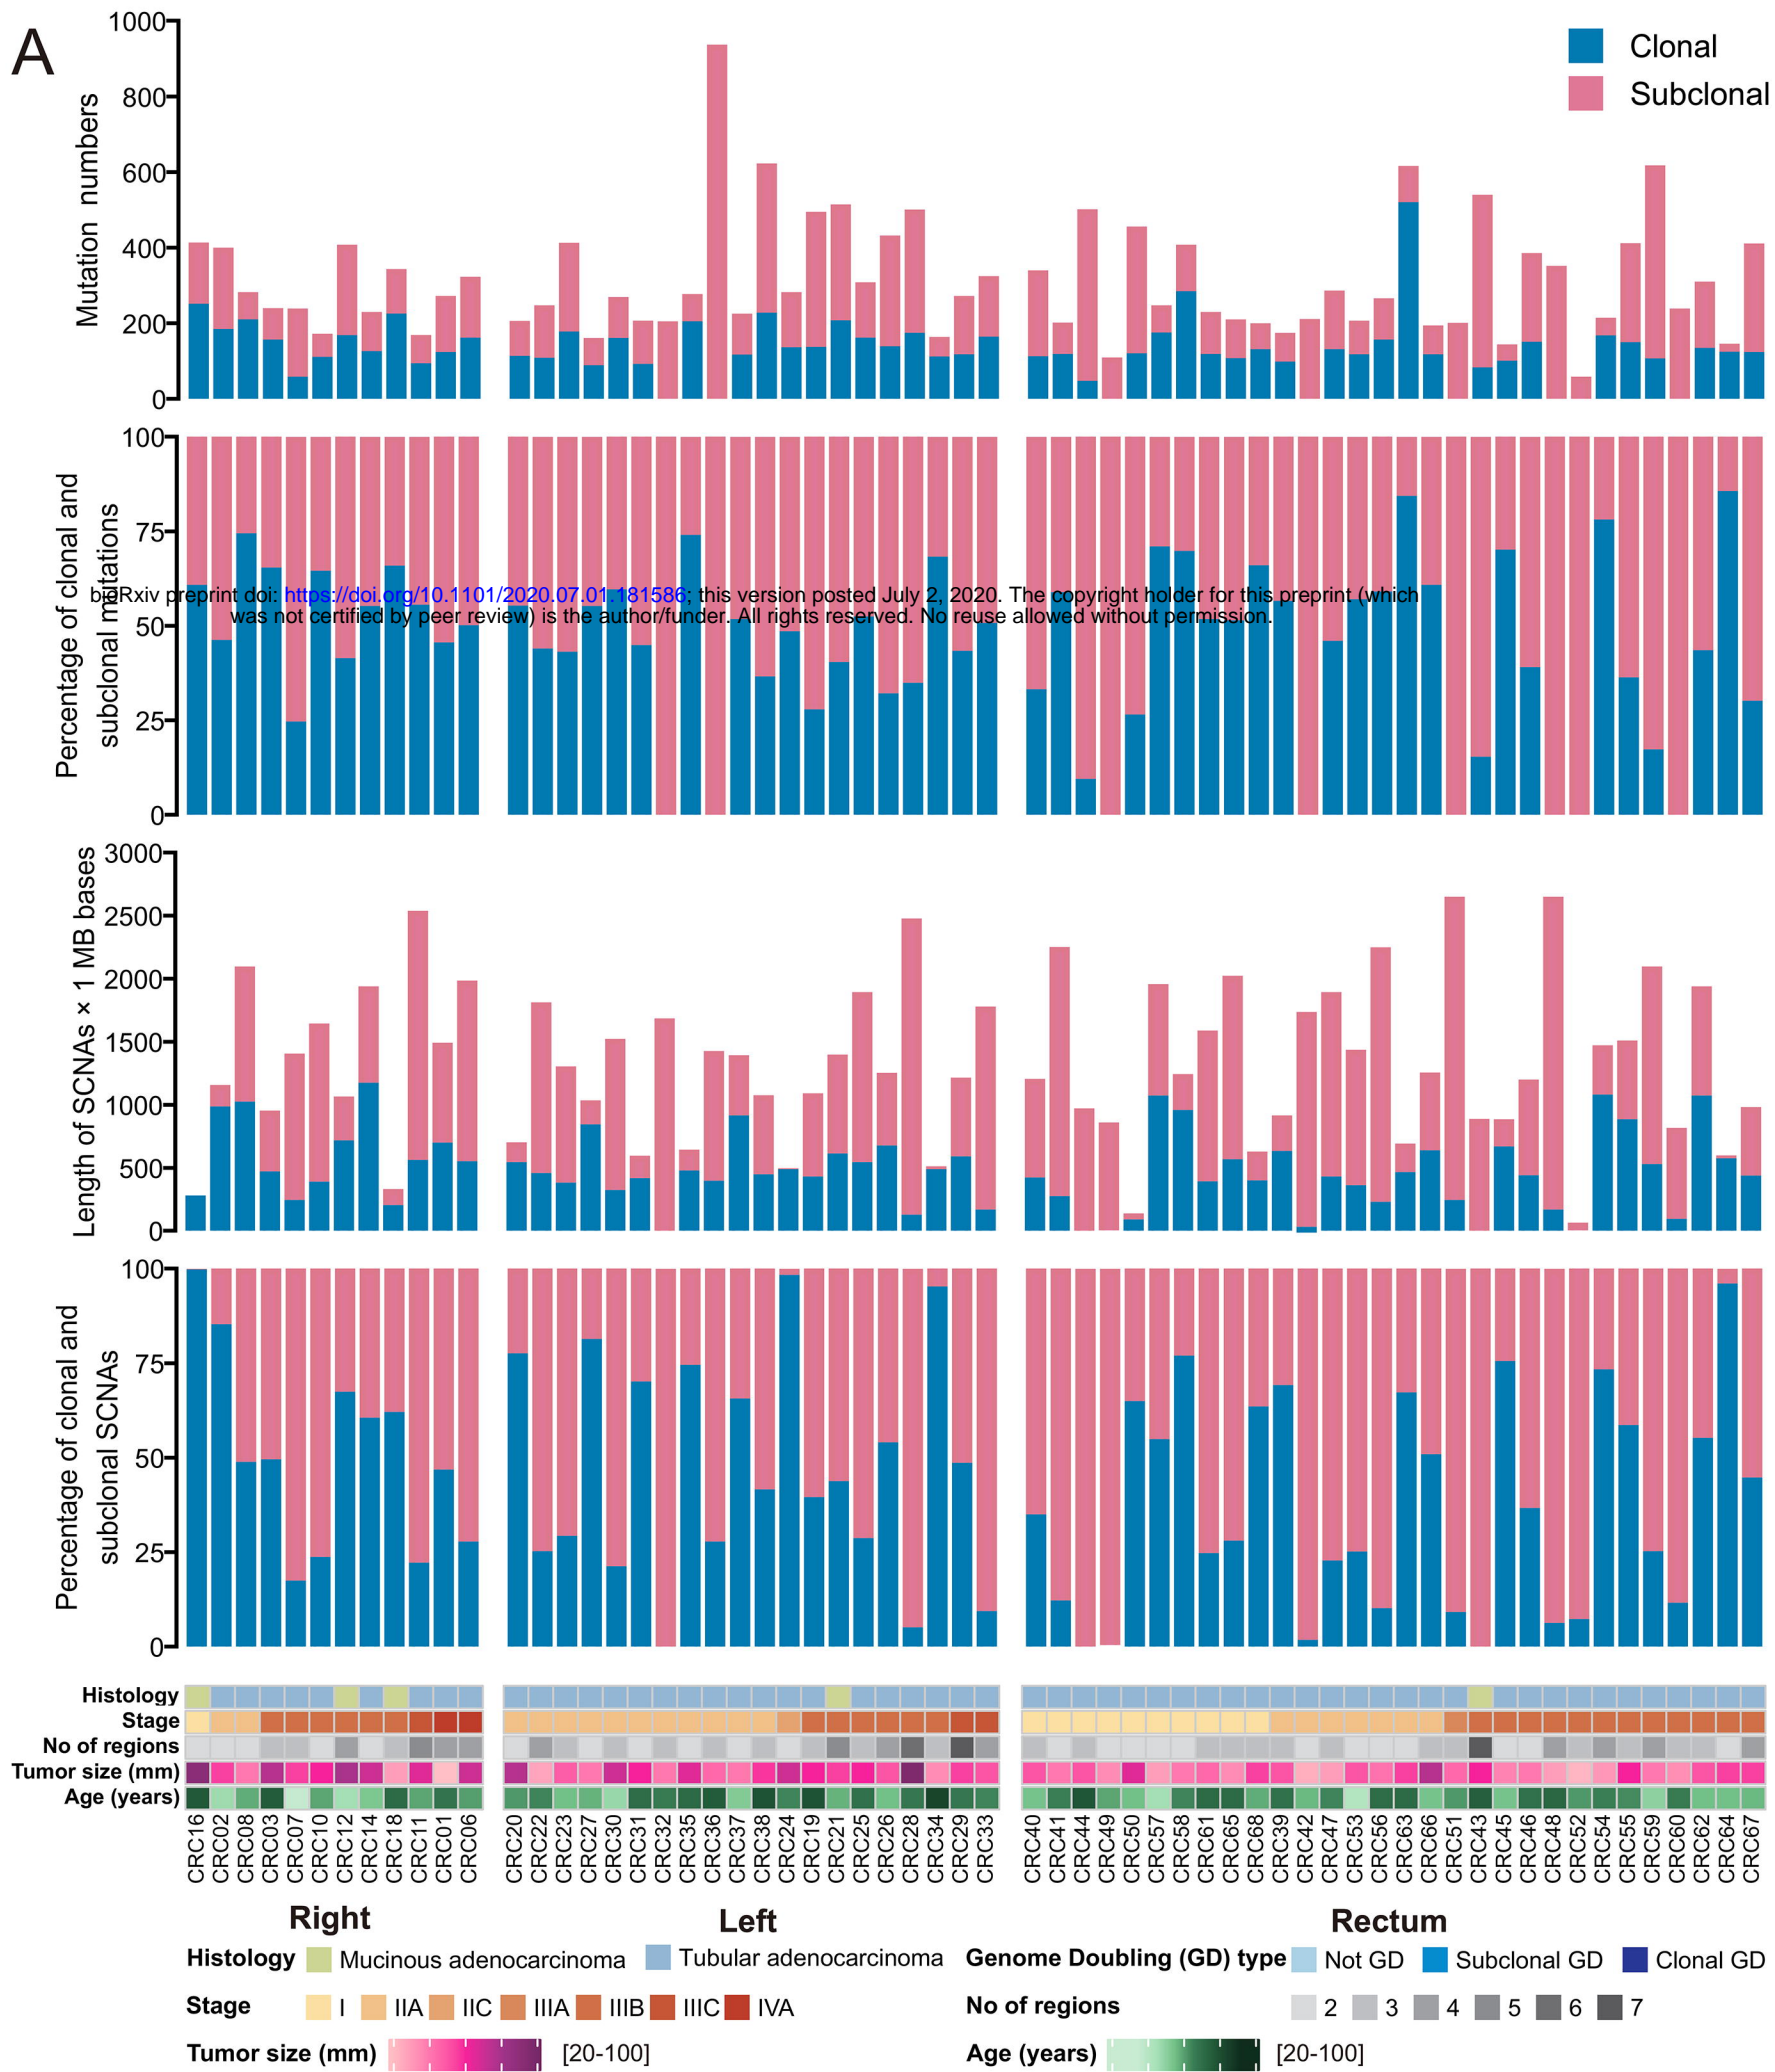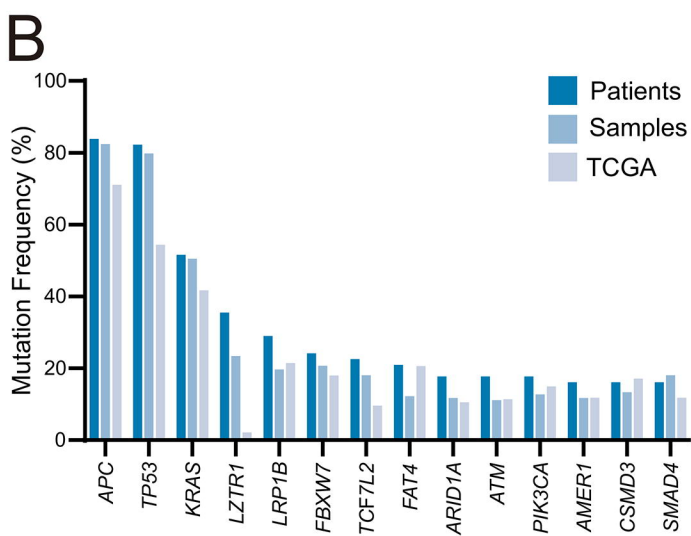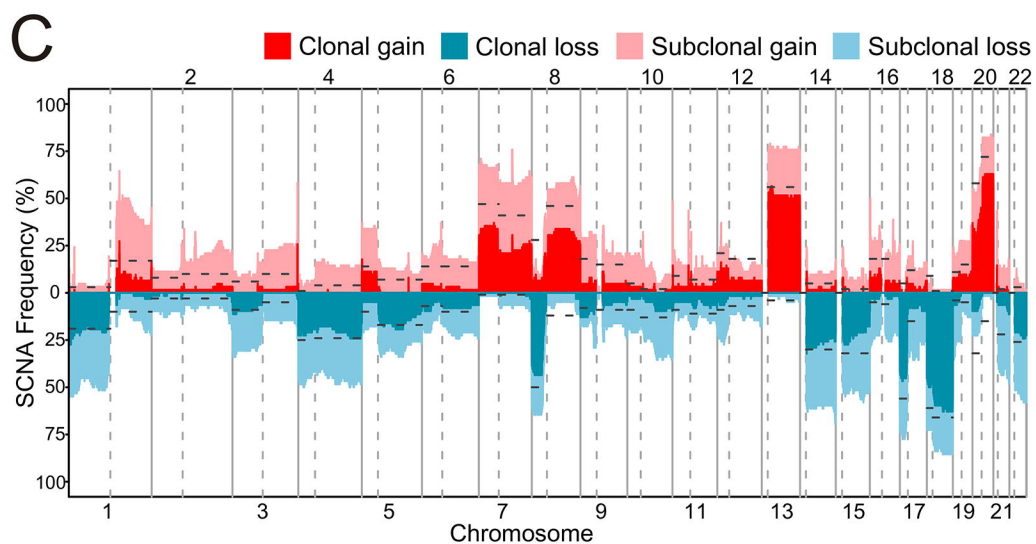

# Figure 2

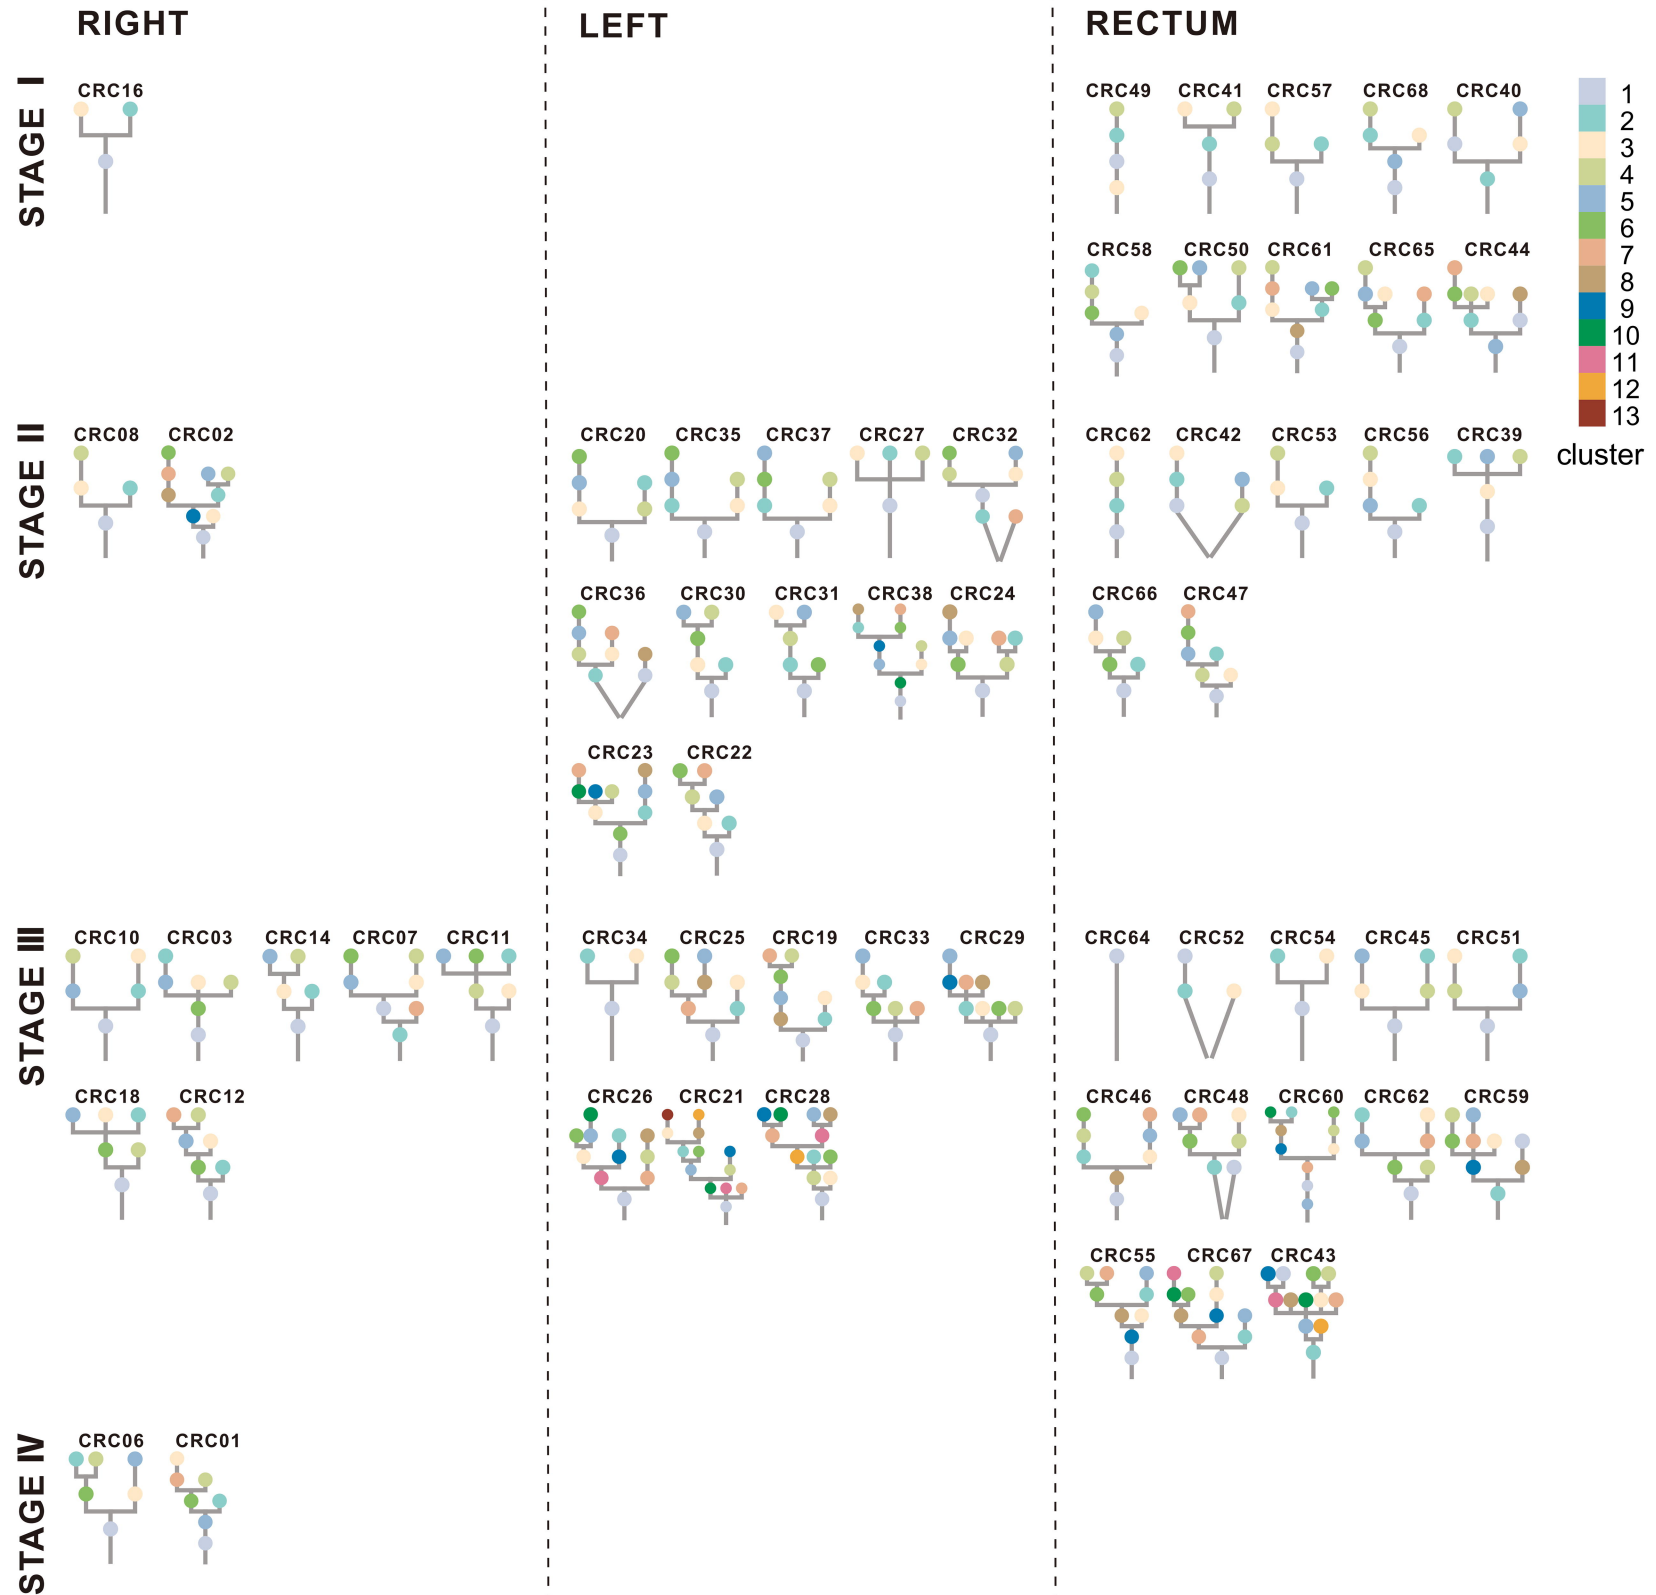

# Figure 3

## Driver Mutations

### Total

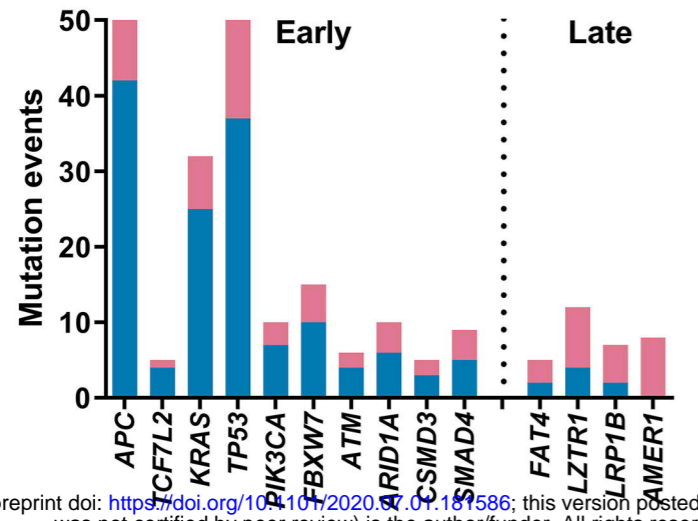

## Driver SCNAs

### Early

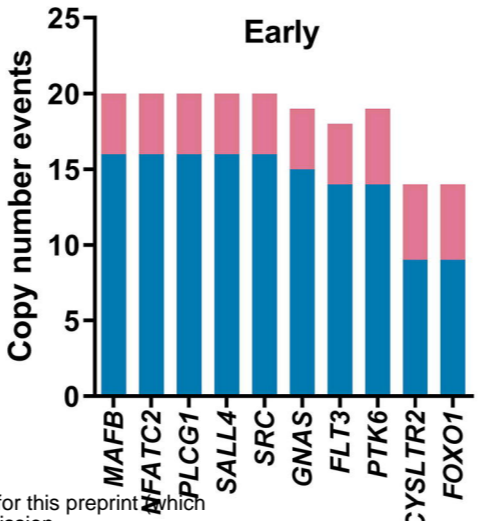

## Arm level SCNAs

### Early

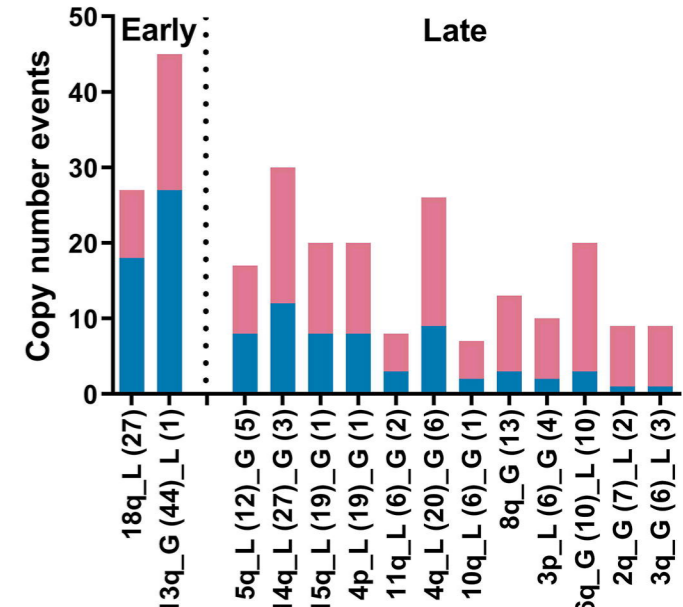

bioRxiv preprint doi: <https://doi.org/10.1101/2020.07.01.187586>; this version posted July 2, 2020. The copyright holder for this preprint (which was not certified by peer review) is the author/funder. All rights reserved. No reuse allowed without permission.

### Right

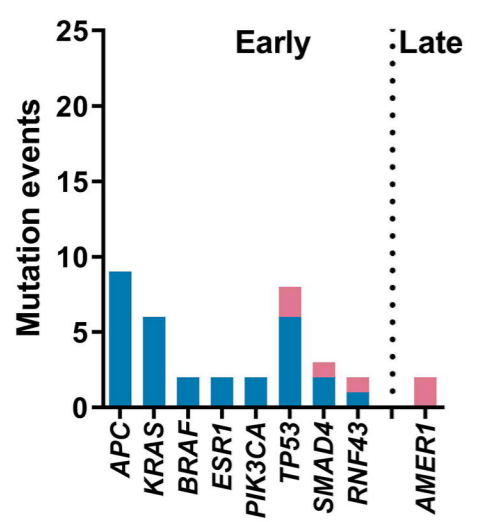

### Early

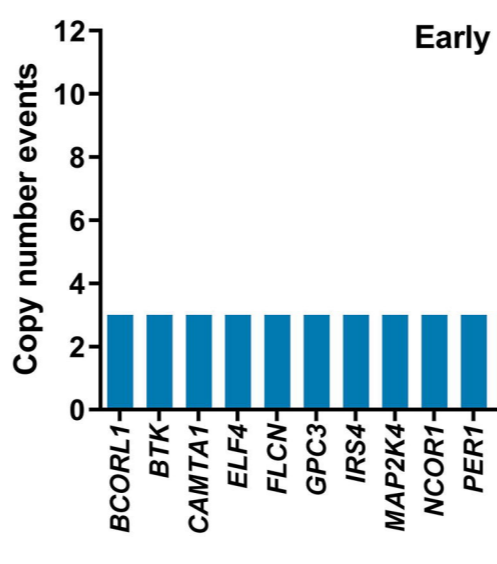

### Late

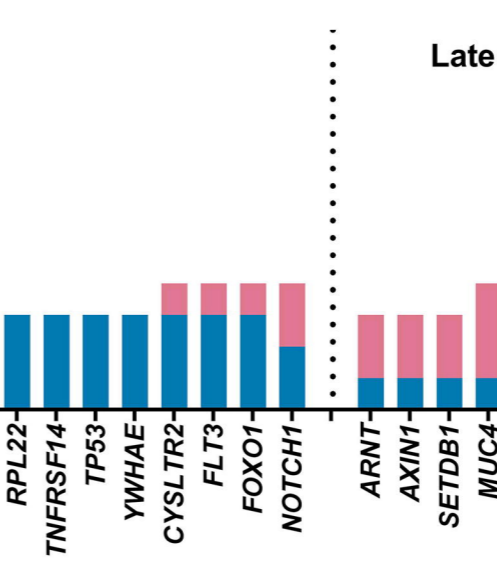

### Early

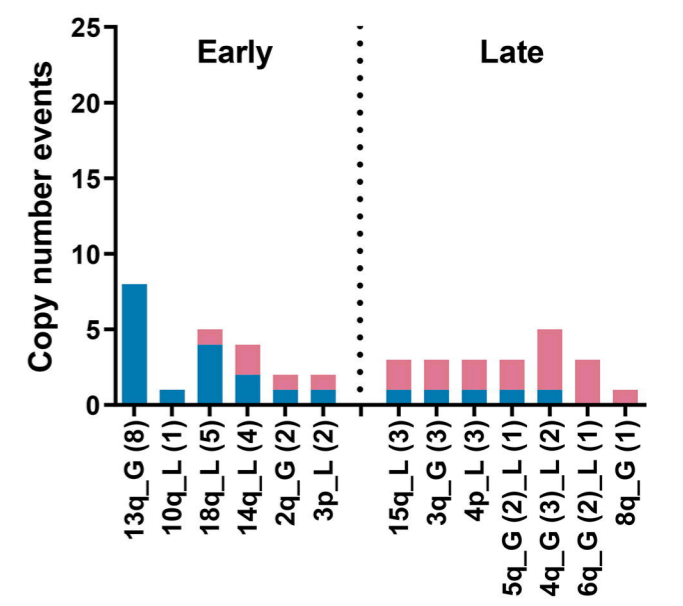

### Left

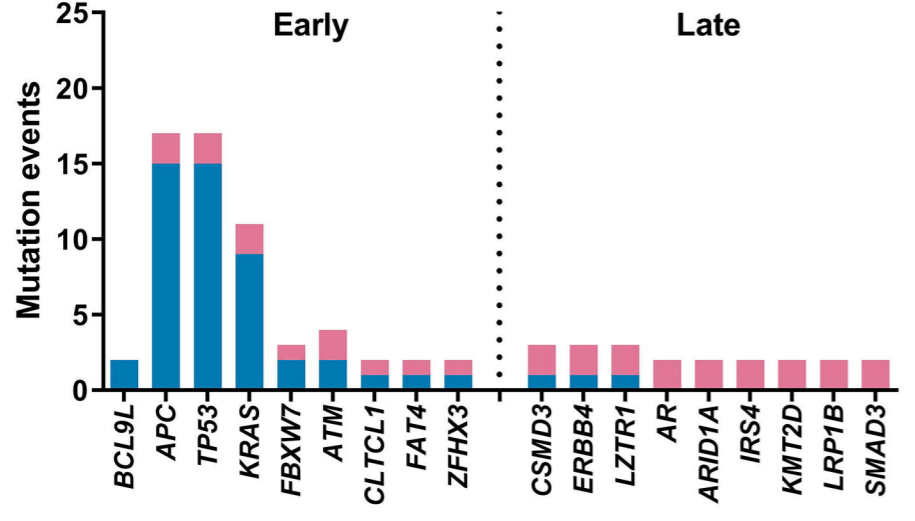

### Early

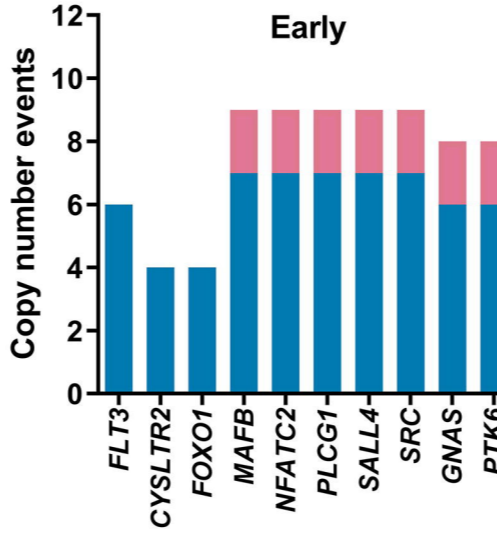

### Early

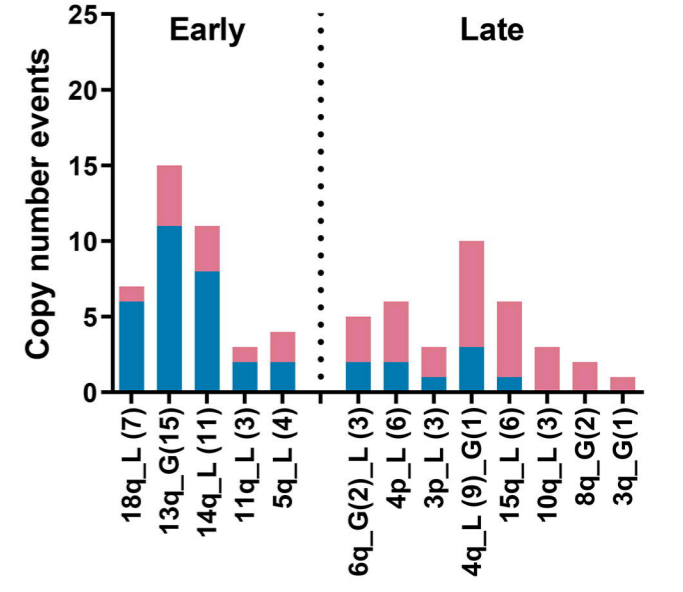

### Rectum

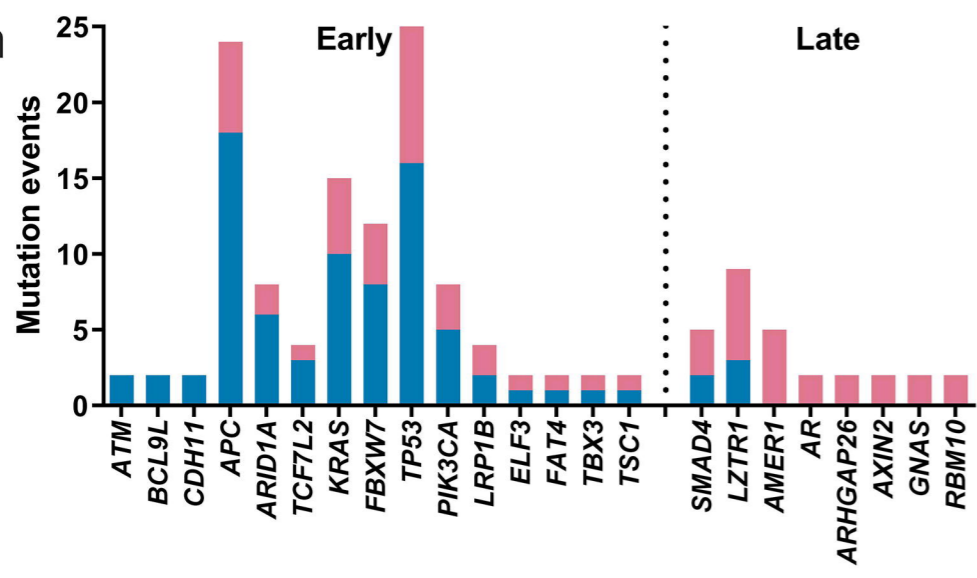

### Early

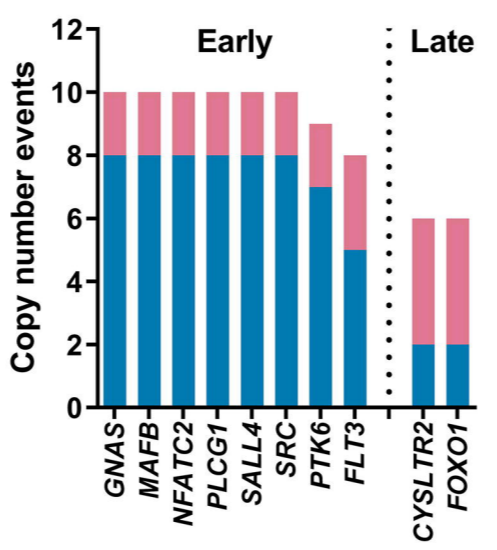

### Late

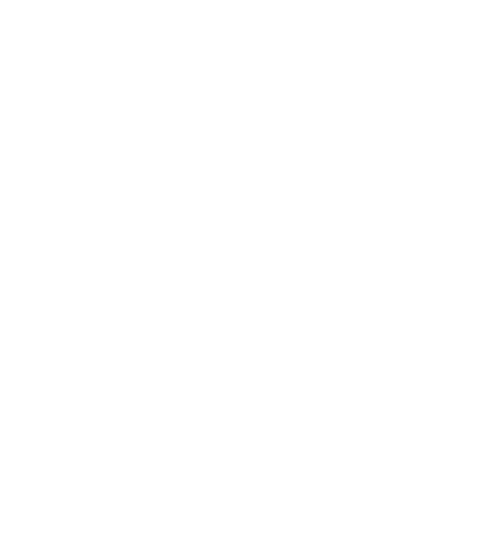

### Early

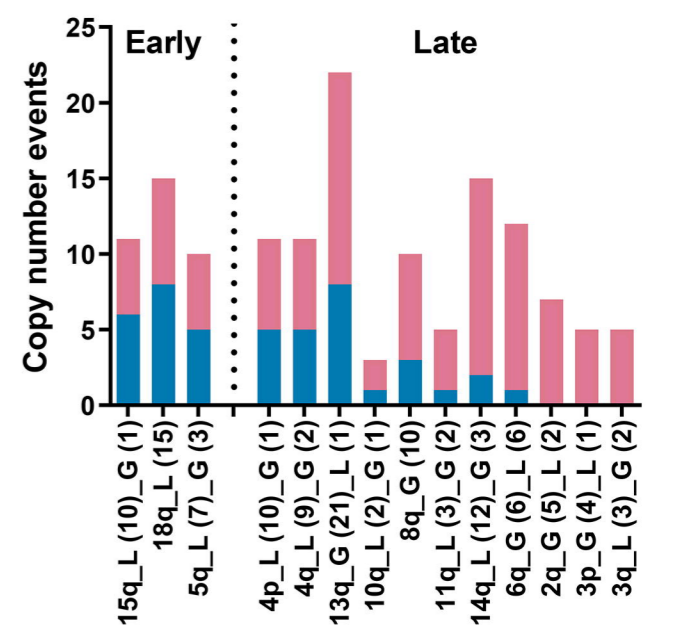

# Figure 4

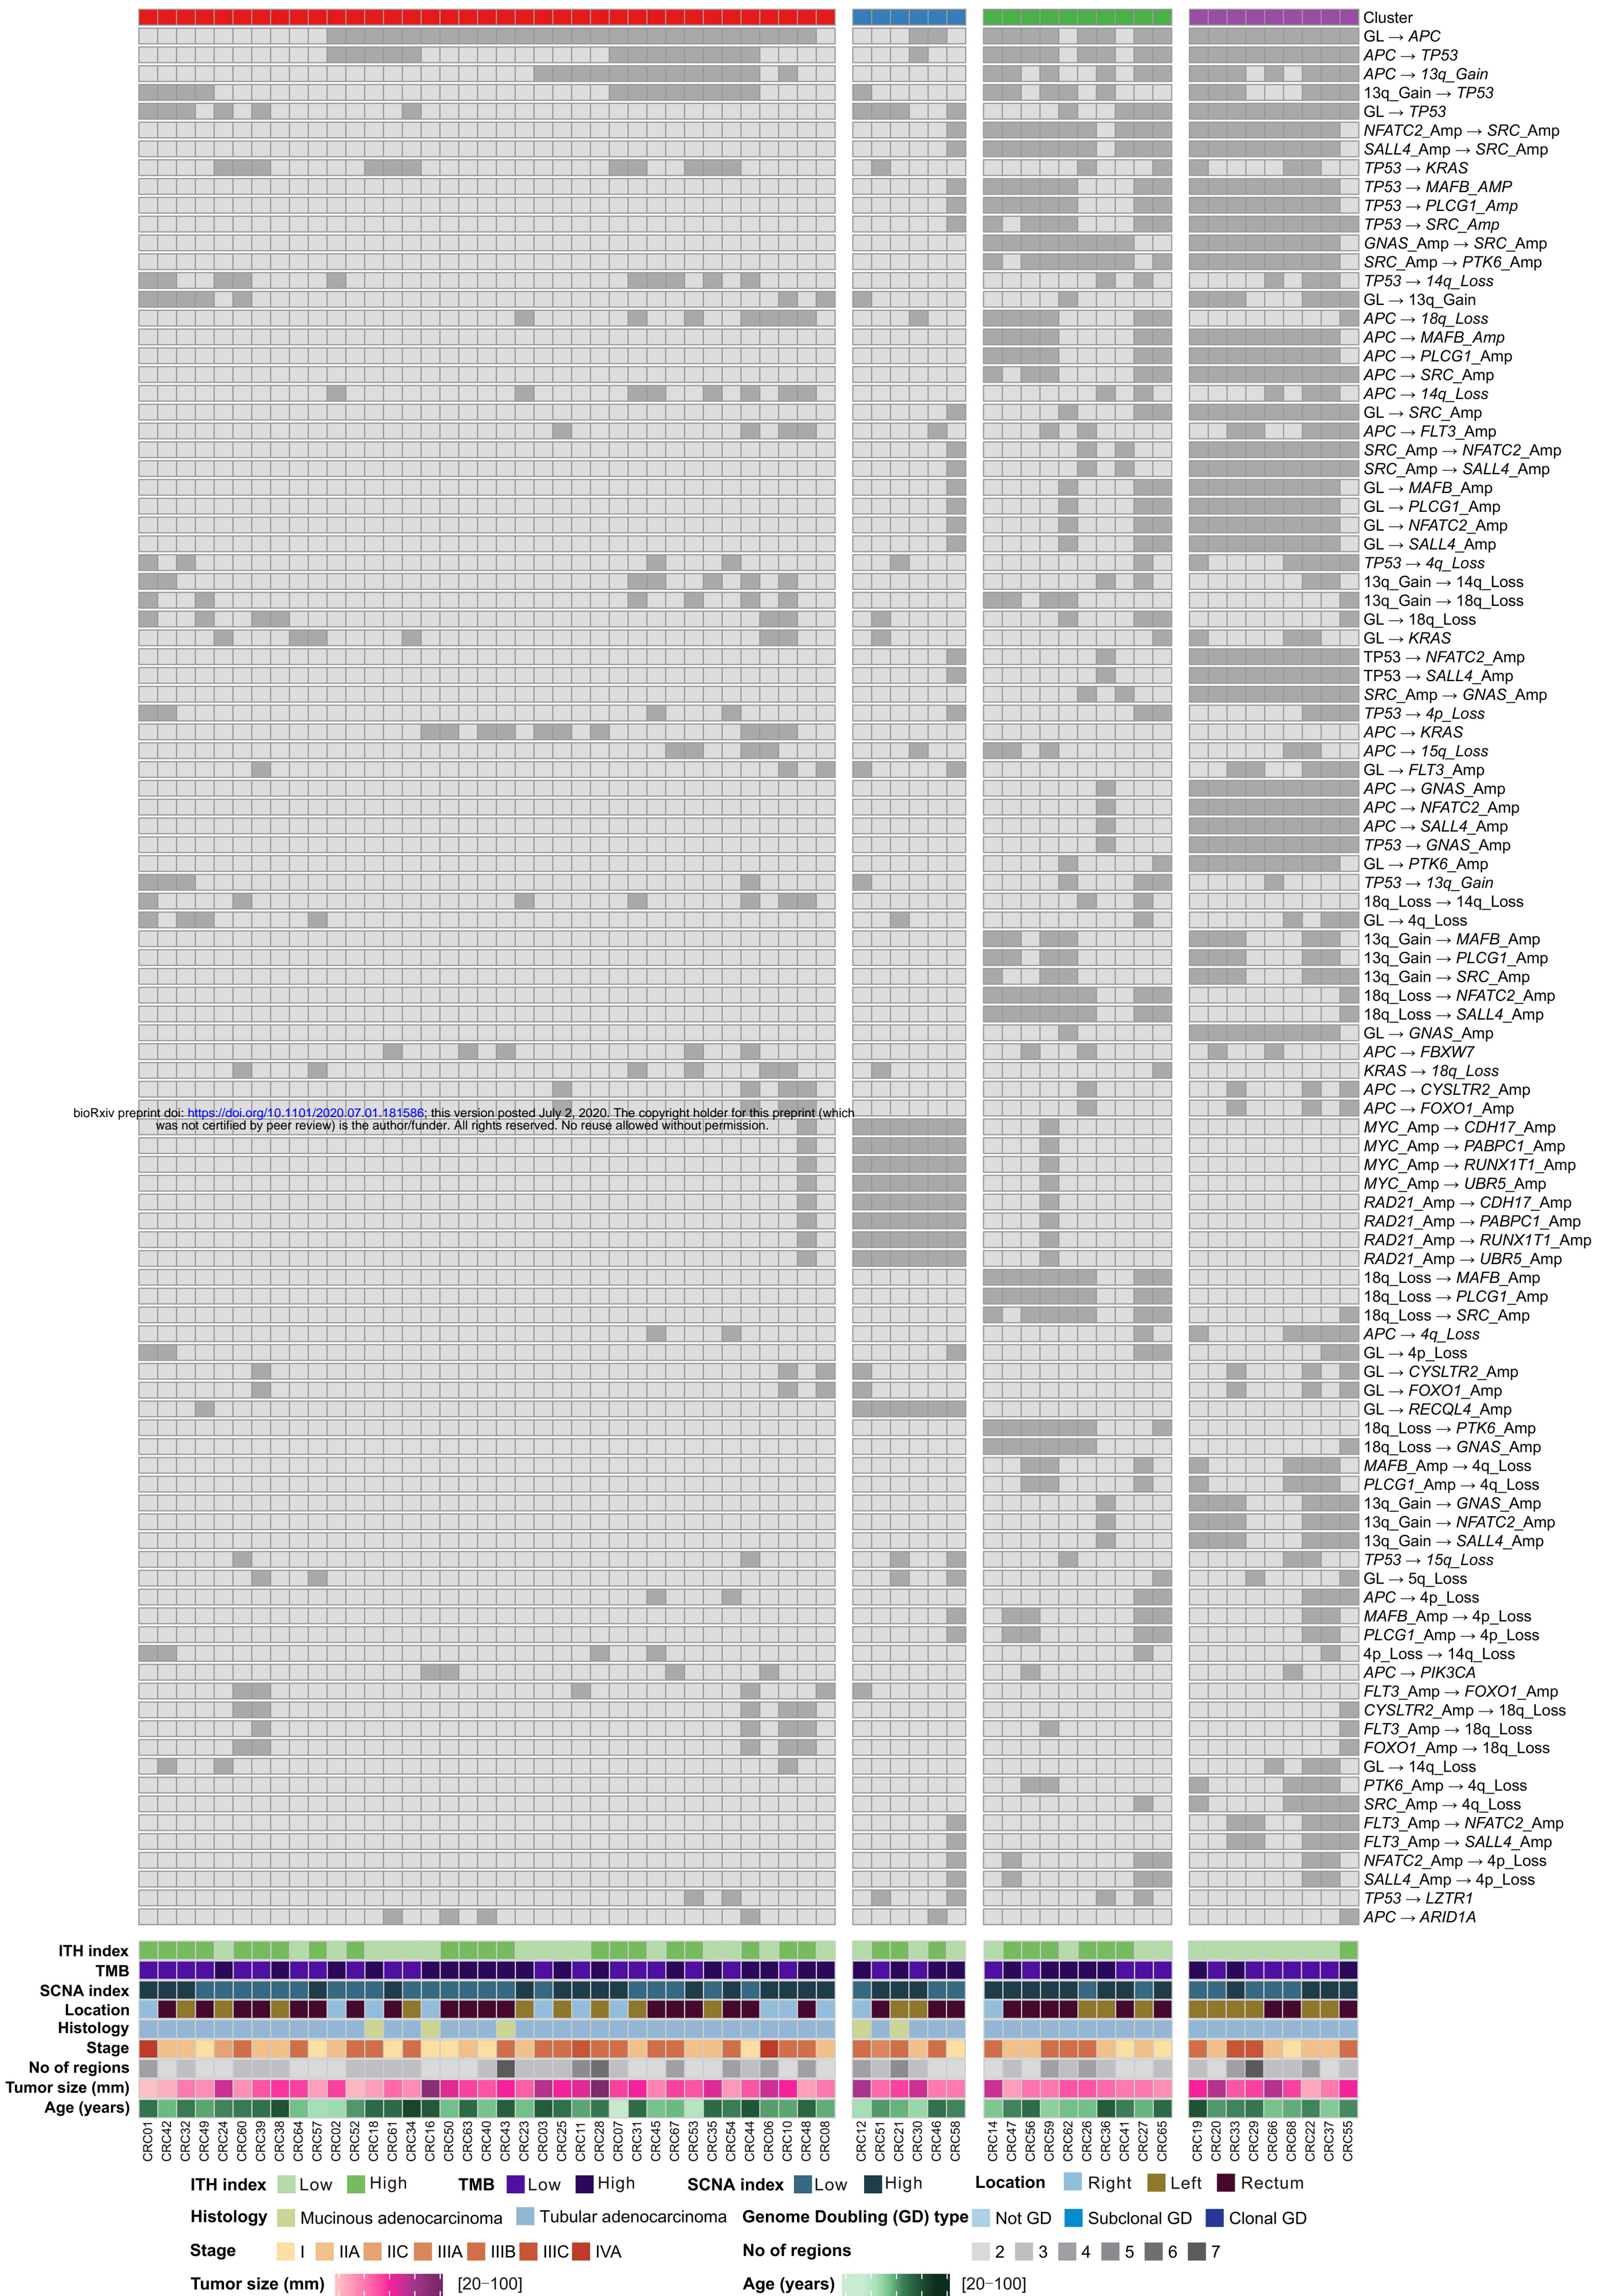

# Figure 5

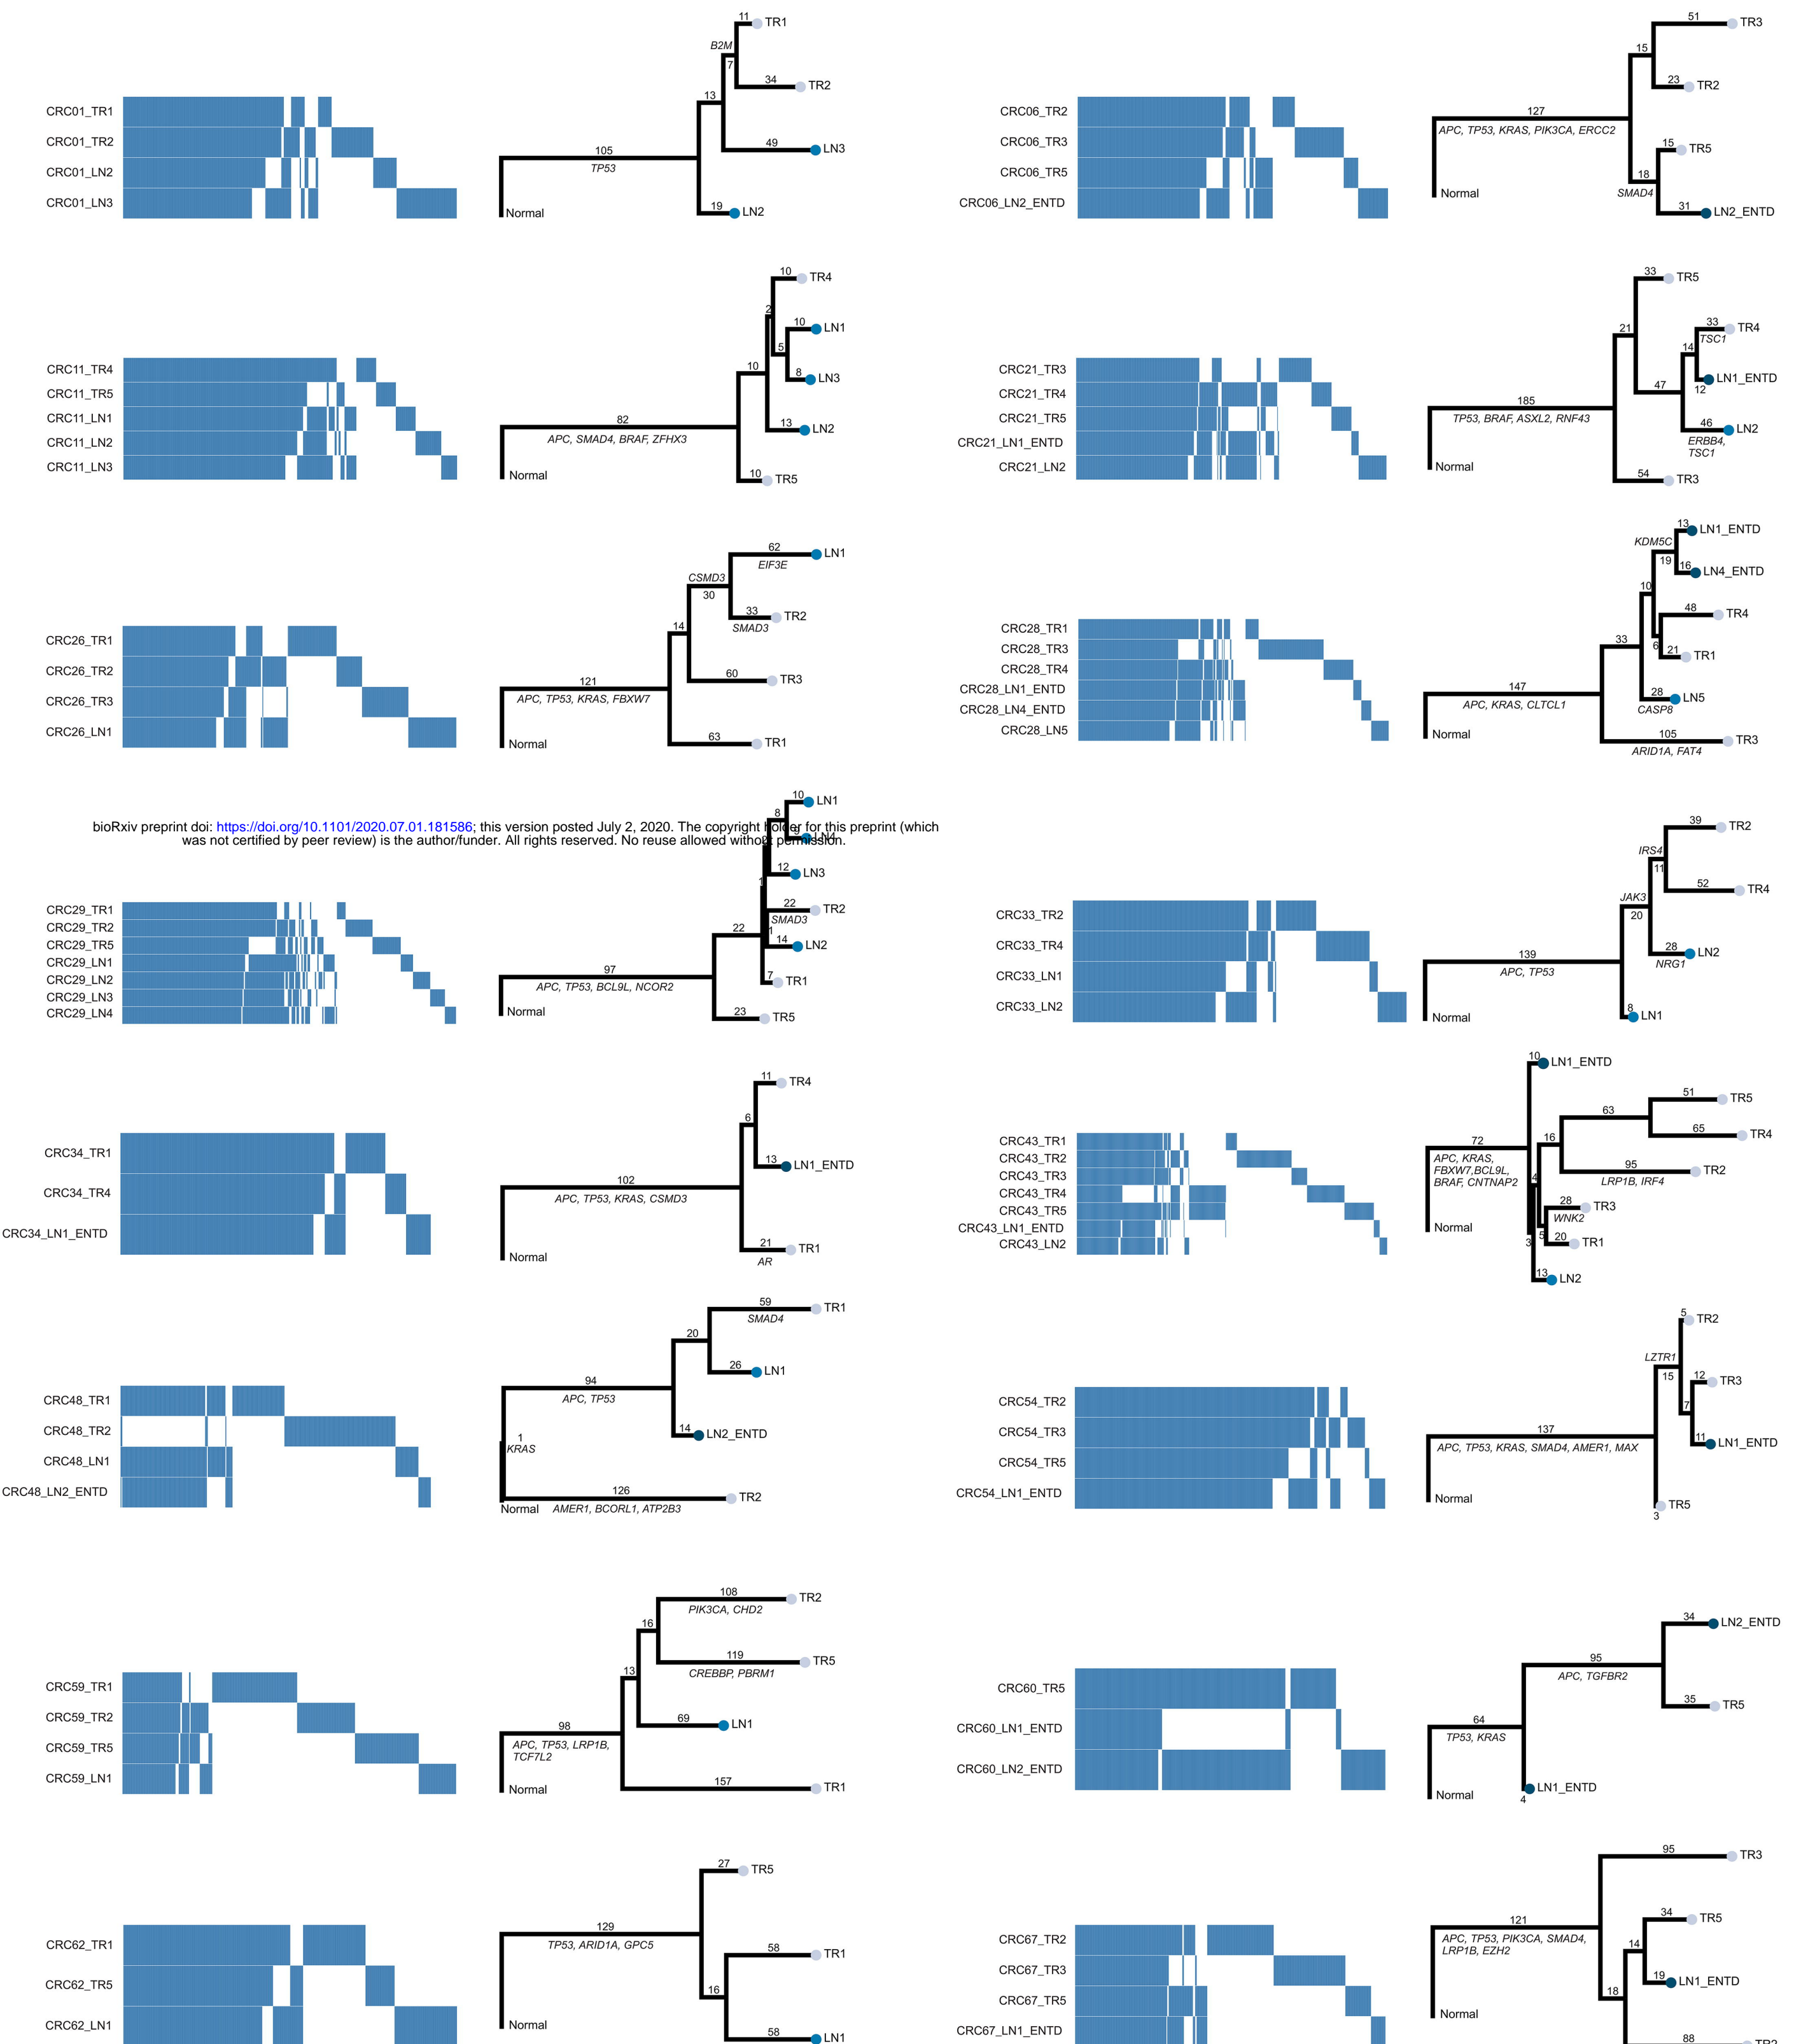



# Figure 6

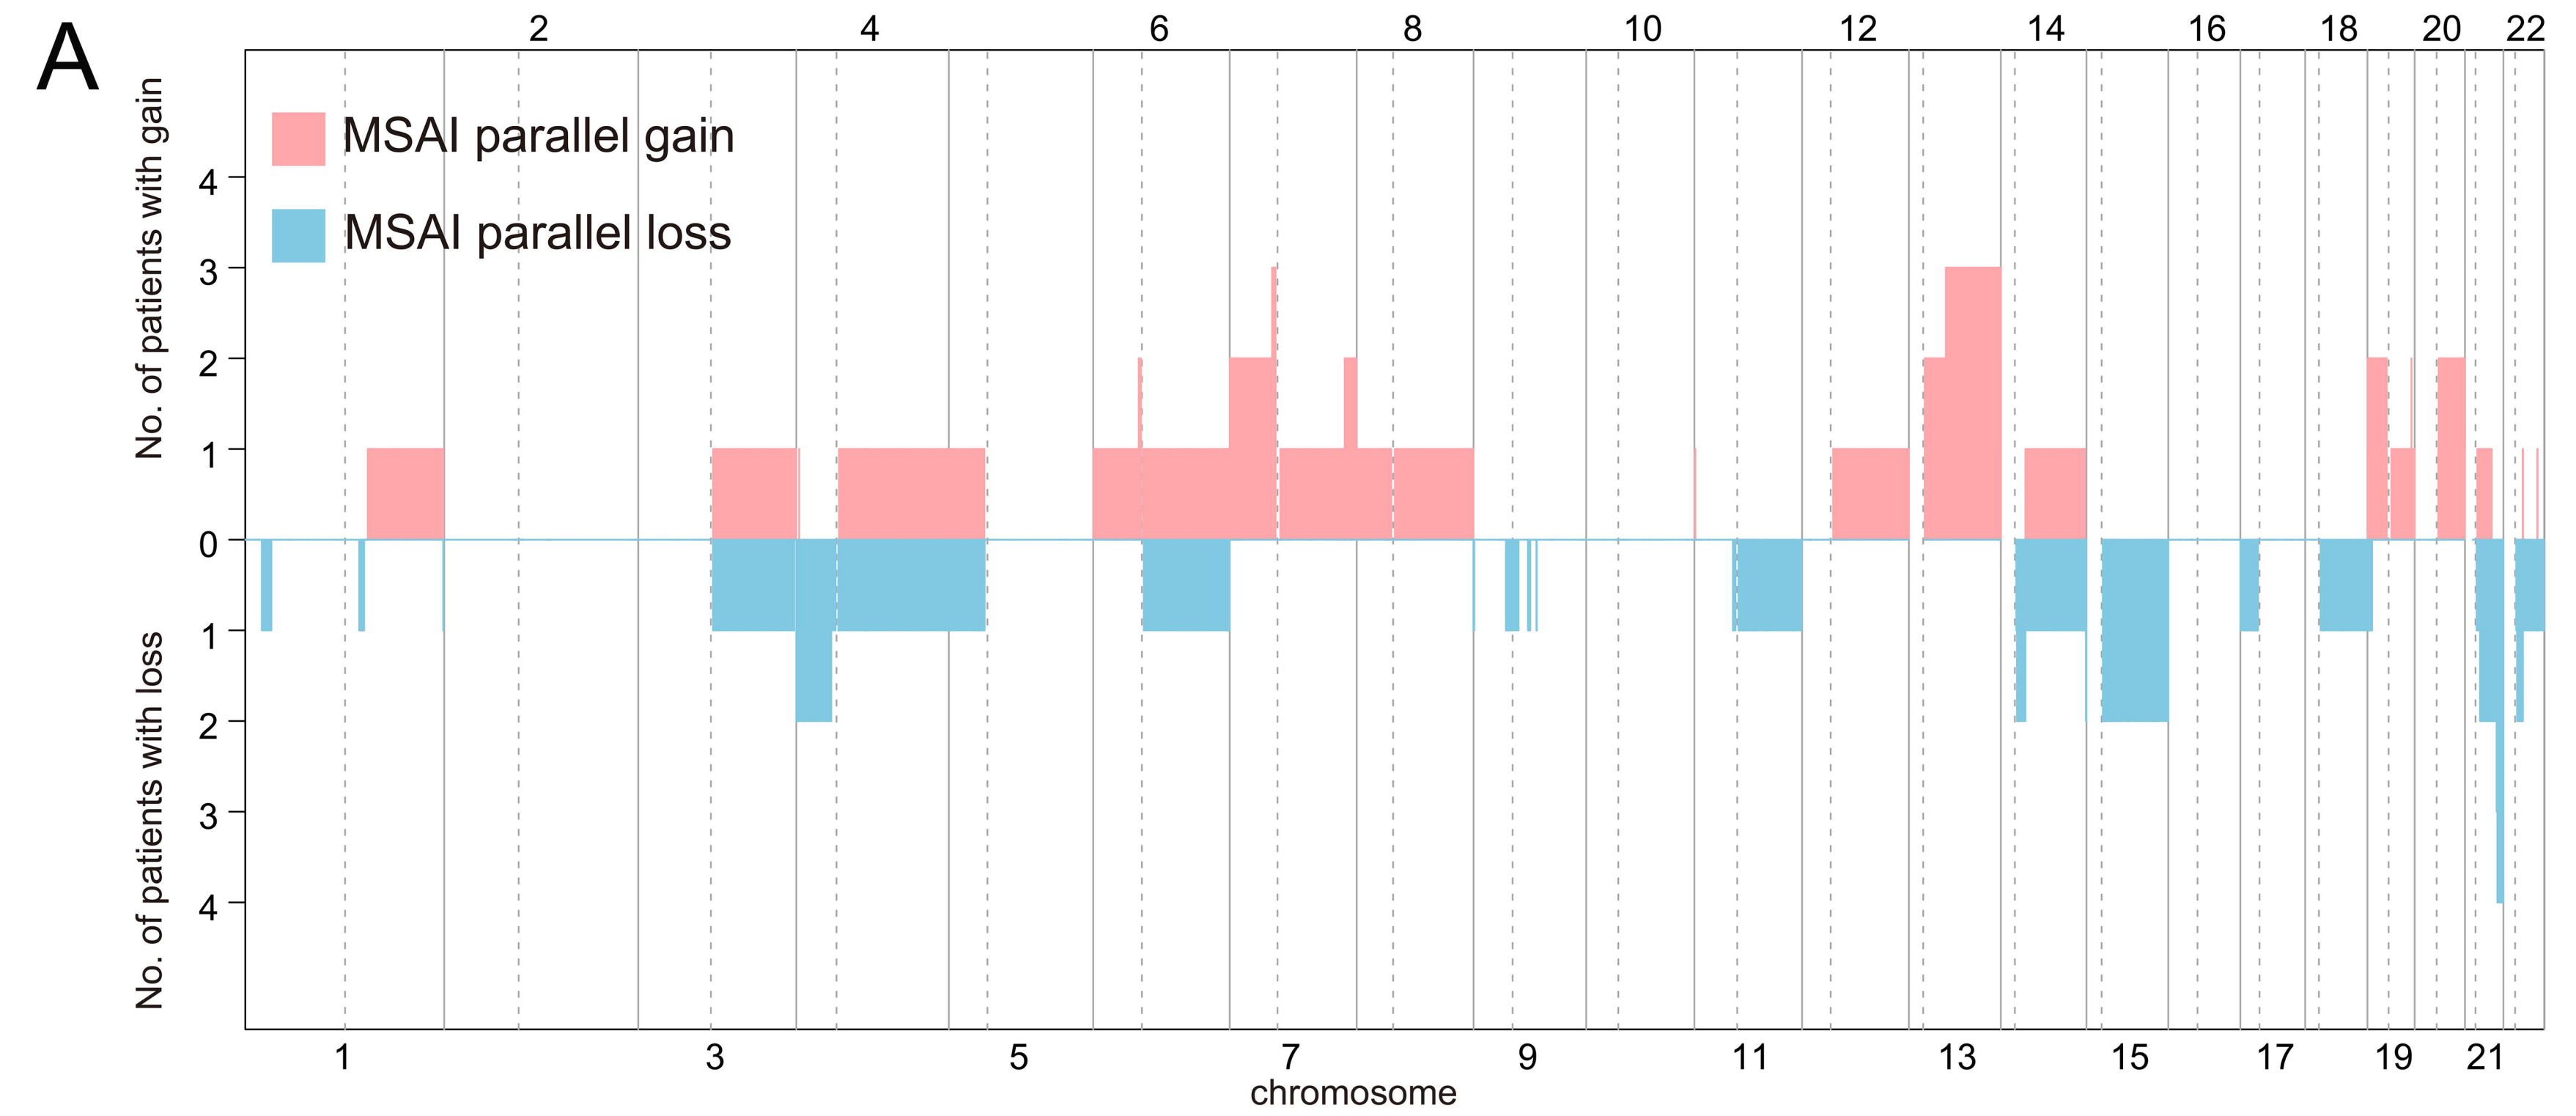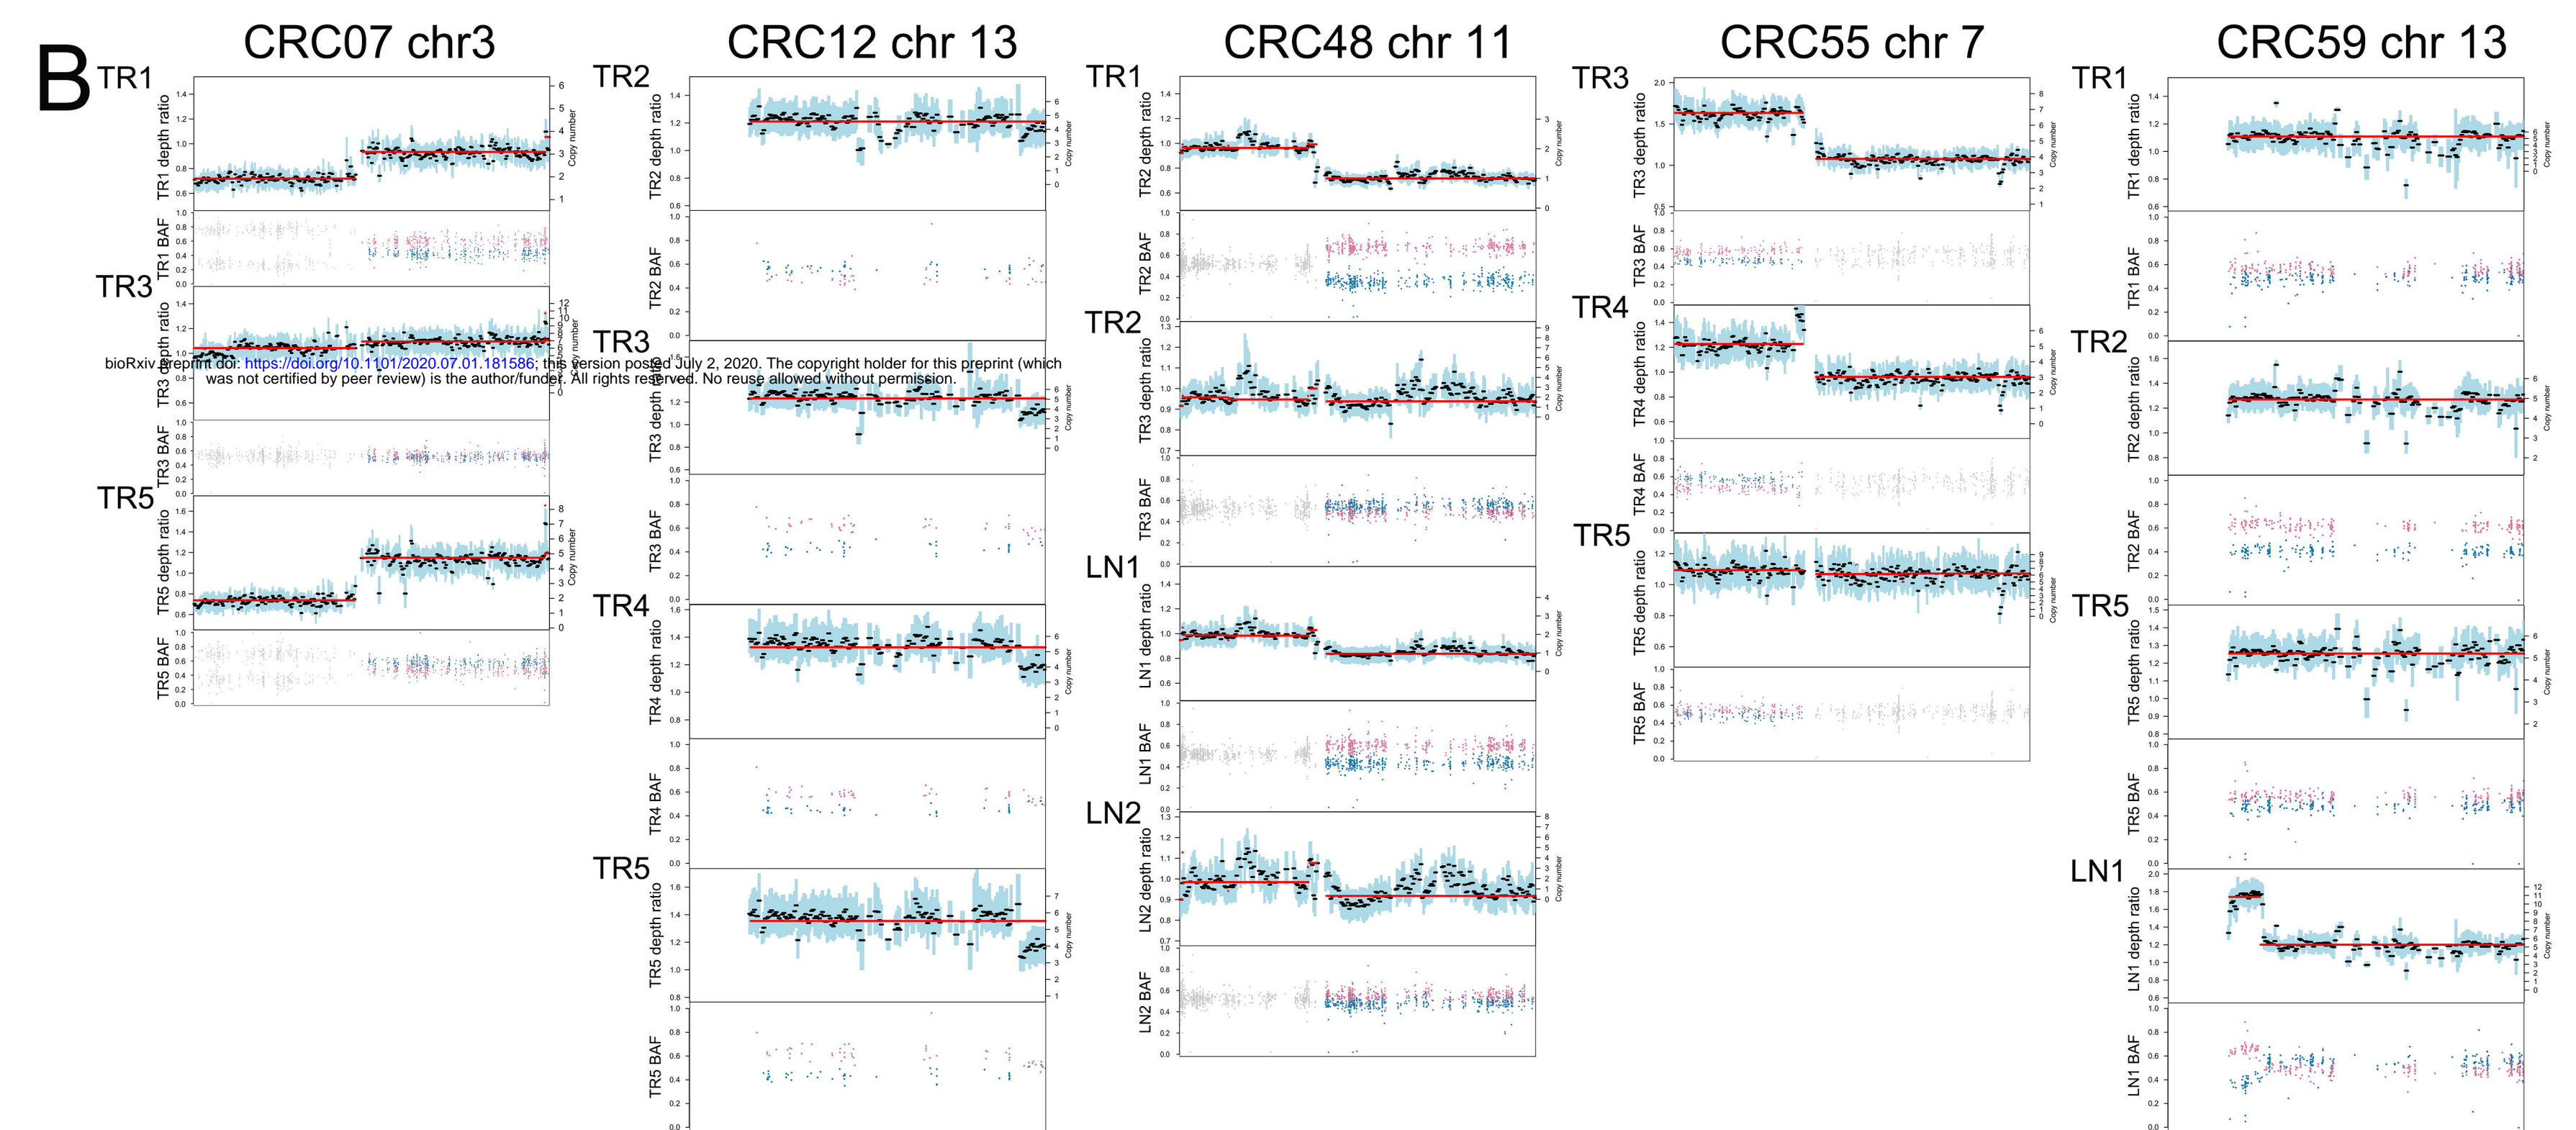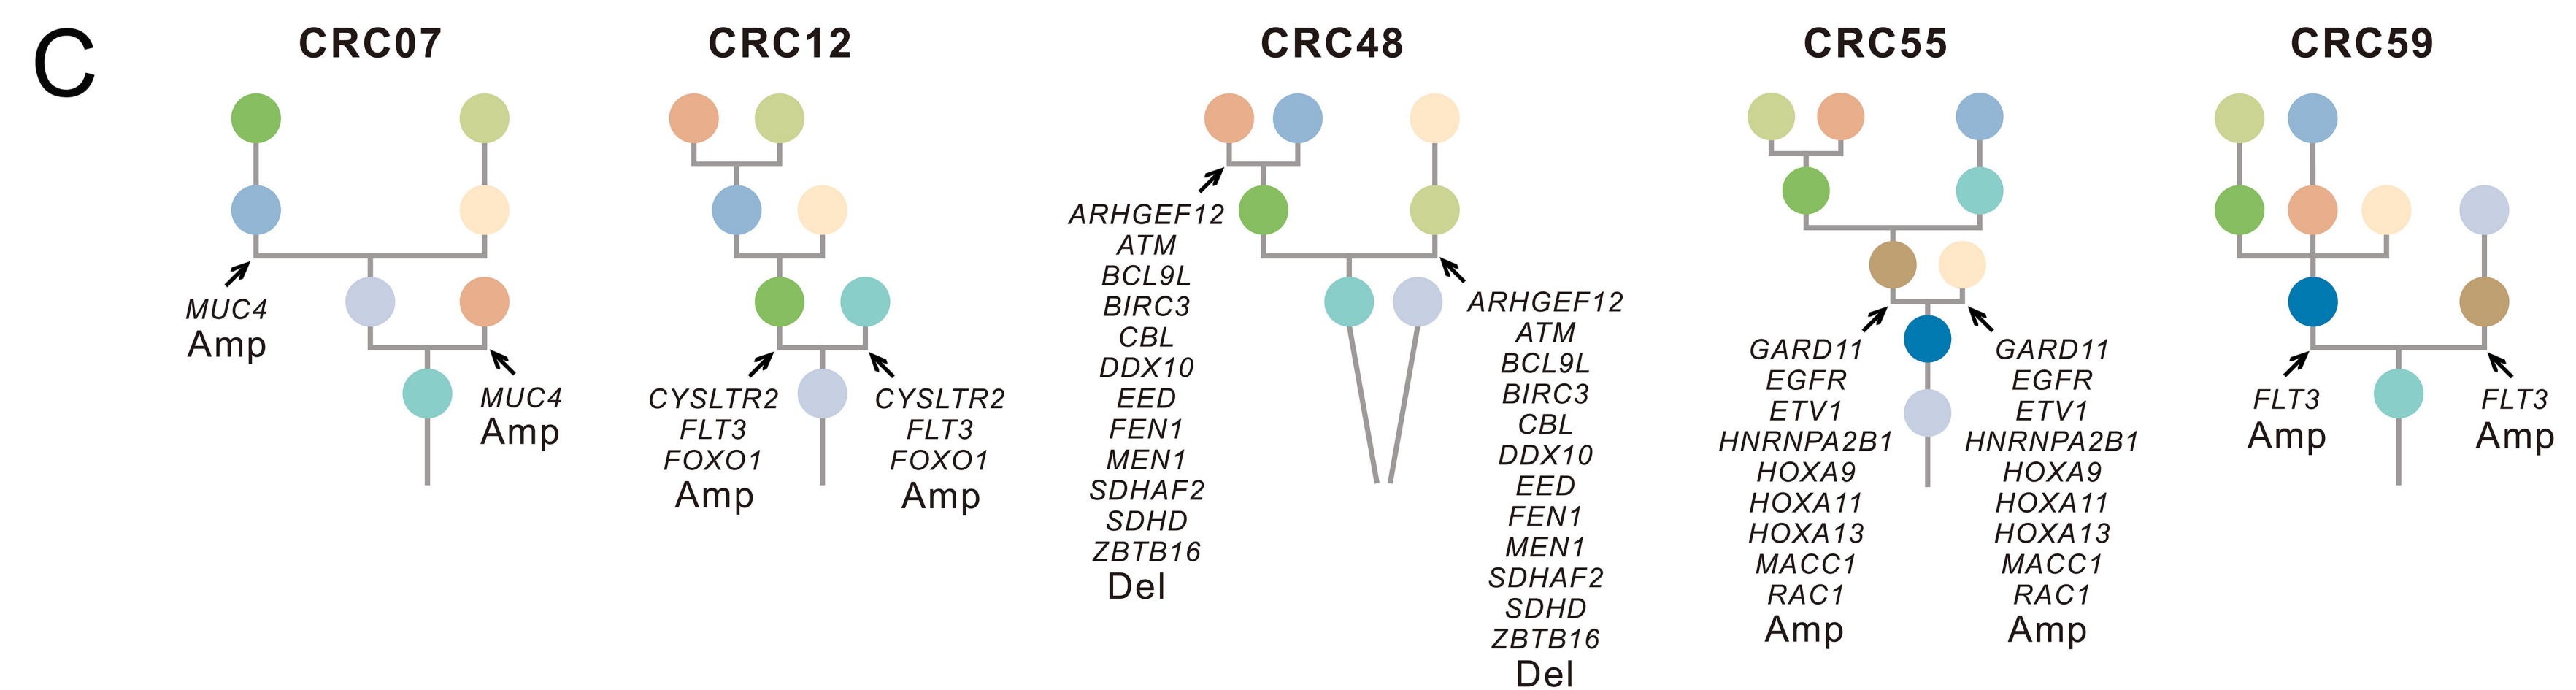

Source: https://biorxiv.org/content/10.1101/2020.07.01.181586v1.full.pdf
